# Supplementary material for: Evolutionarily related host and microbial pathways regulate fat desaturation in C. elegans
Source: PubMed Central journal article supplement (PMC10876521; doi:10.1038/s41467-024-45782-2), 2024-02-19

# Supplementary Information

## Evolutionarily related host and microbial pathways regulate fat desaturation in *C. elegans*

Bennett W. Fox<sup>1</sup>, Maximilian J. Helf<sup>1,#</sup>, Russell N. Burkhardt<sup>1,#</sup>, Alexander B. Artyukhin<sup>2</sup>, Brian J. Curtis<sup>1</sup>, Diana Fajardo Palomino<sup>1</sup>, Allen F. Schroeder<sup>1</sup>, Amaresh Chaturbedi<sup>3</sup>, Arnaud Tauffenberger<sup>1</sup>, Chester J.J. Wrobel<sup>1</sup>, Ying K. Zhang<sup>1</sup>, Siu Sylvia Lee<sup>3</sup>, Frank C. Schroeder<sup>1,\*</sup>

<sup>1</sup>Boyce Thompson Institute and Department of Chemistry and Chemical Biology, Cornell University, Ithaca, New York 14853, United States

<sup>2</sup>Chemistry Department, College of Environmental Science and Forestry, State University of New York, Syracuse, New York 13210, United States

<sup>3</sup>Department of Molecular Biology and Genetics, Cornell University, Ithaca, New York 14853, United States

#These authors contributed equally.

\*Correspondence to [fs31@cornell.edu](mailto:fs31@cornell.edu)

20 **Contents**  
 21  
 22 Supplementary Figures ..... 2  
 23 Supplementary Methods ..... 14  
 24 Supplementary Tables ..... 21  
 25 Supplementary References ..... 26  
 26 NMR Spectra of Synthetic Compounds ..... 27  
 27

28 **Supplementary Figures**

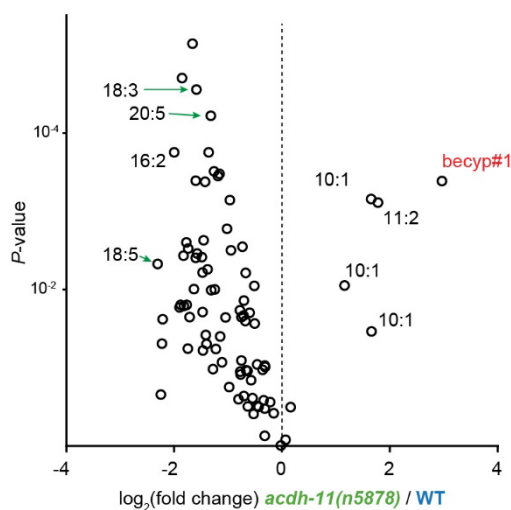

29  
 30 **Supplementary Fig. 1. Comparison of free fatty acid profiles of WT and *acdh-11(n5878)* *C. elegans*.**  
 31

32 Volcano plot for 85 fatty acids detected by HPLC-HRMS (negative ion, post-column ion pairing)  
 33 in the *endo*-metabolomes of WT and *acdh-11(n5878)* mutant *C. elegans* fed BW25113 (WT) *E. coli*. *P*-values were calculated by unpaired, two-sided Welch's t-test; no adjustments were made  
 34 for multiple comparisons. The most significantly enriched free fatty acid in *acdh-11* mutants is  
 35 becyp#1; additional cyclopropane-containing medium chain fatty acids are also enriched in  
 36 *acdh-11* mutants relative to WT *C. elegans*. Several PUFAs were depleted in *acdh-11* relative to  
 37 WT, e.g., eicosapentaenoic acid (20:5), likely due to reduced growth of these animals when  
 38 reared on WT *E. coli*. This data is also displayed as part of **Fig. 2C**.  
 39

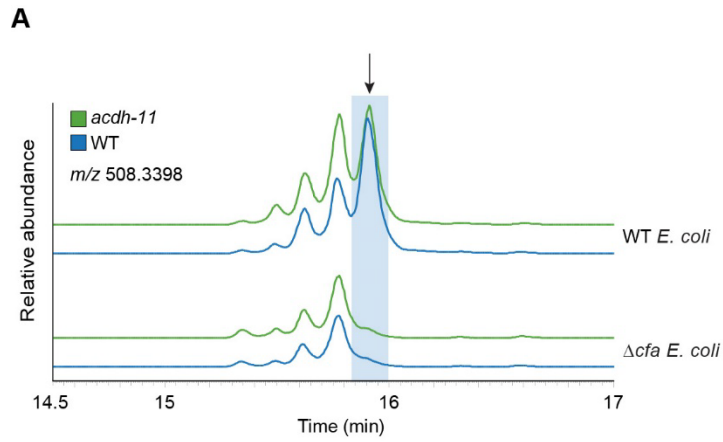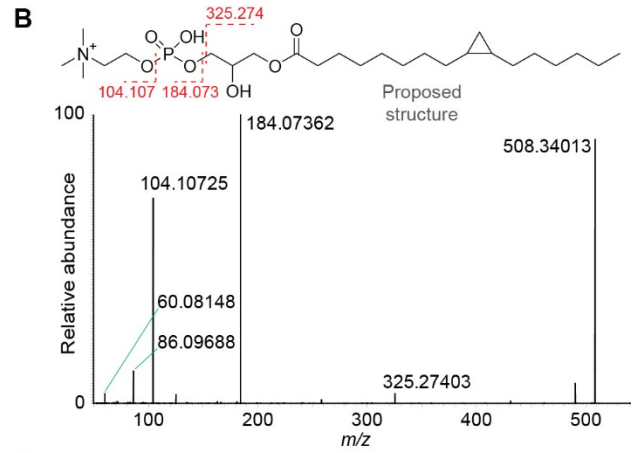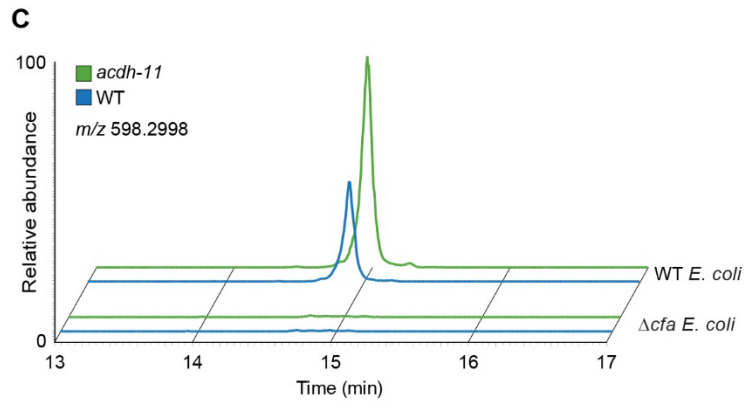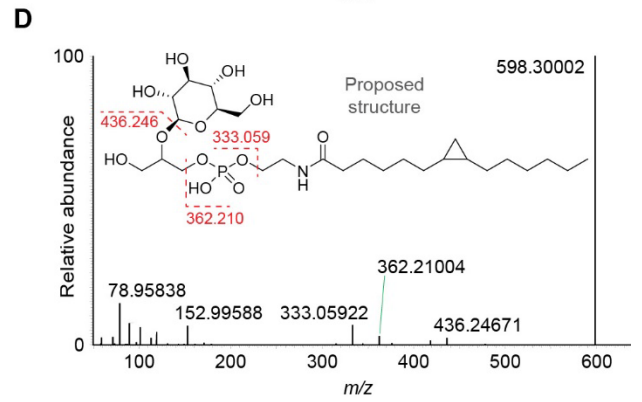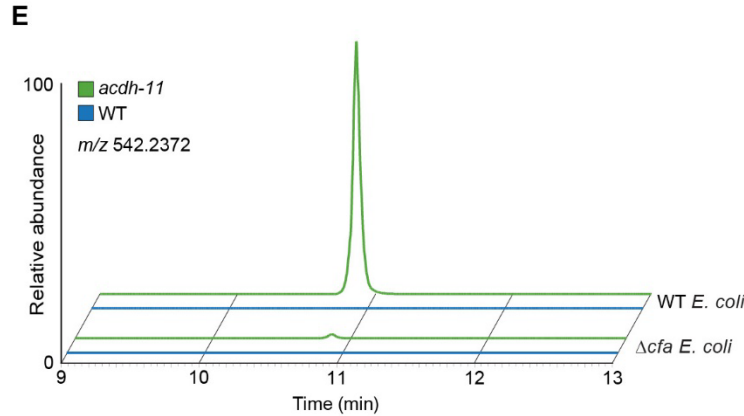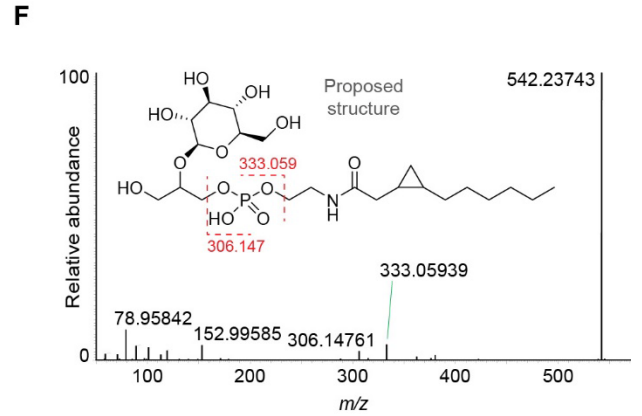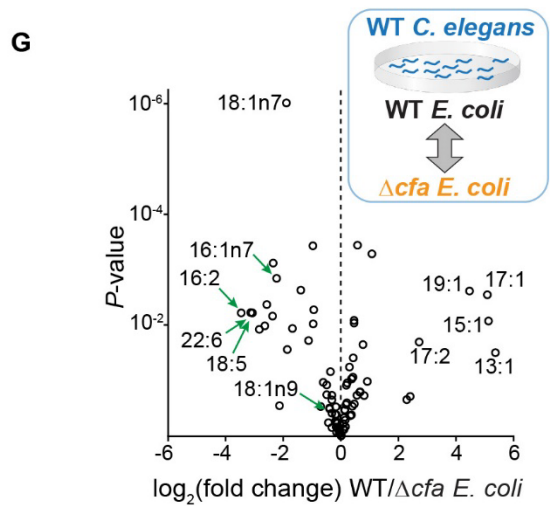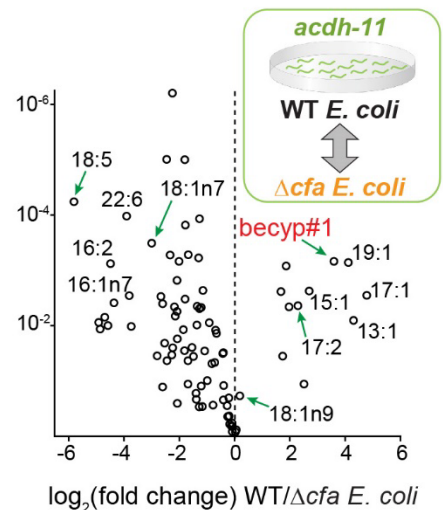

41 **Supplementary Fig. 2. Cyclopropane fatty acids are incorporated into host lipids.**

42 **A)** EICs for  $m/z$  508.3398, corresponding to lysophosphatidylcholine (LPC) isomers bearing a  
43 singly unsaturated C<sub>17</sub> acyl group (17:1) with formula C<sub>25</sub>H<sub>51</sub>NO<sub>7</sub>P<sup>+</sup>, in extracts of WT and *acd-*  
44 *11(5878)* mixed-stage cultures reared on WT *E. coli* or *E. coli*  $\Delta$ *cfa*, as indicated. The feature  
45 marked with an arrow is present in animals reared on WT *E. coli* but absent from animals reared  
46 on *E. coli*  $\Delta$ *cfa*.

47 **B)** MS/MS spectrum (positive ion mode) of LPC-17:1 with major fragmentation reactions and  
48 product ions.

49 **C)** EICs for  $m/z$  598.2998, corresponding to *N*-acyl glycoylglycerophosphoethanolamine (GLEA)  
50 bearing a singly unsaturated C<sub>15</sub> acyl group (15:1) with formula C<sub>26</sub>H<sub>49</sub>NO<sub>12</sub>P<sup>-</sup>, in extracts of WT  
51 and *acd-11(5878)* mixed-stage cultures reared on WT *E. coli* or *E. coli*  $\Delta$ *cfa*, as indicated.  
52 GLEA-15:1 is abundant in animals reared on WT *E. coli* but absent from animals reared on *E.*  
53 *coli*  $\Delta$ *cfa*. Structure proposal based on previous characterization of GLEA<sup>47</sup>.

54 **D)** MS/MS spectrum (negative ion mode) of GLEA-15:1 with major fragmentation reactions and  
55 product ions.

56 **E)** EICs for  $m/z$  542.2372, corresponding to GLEA bearing a singly unsaturated C<sub>11</sub> acyl group  
57 (11:1, becyp#1) with formula C<sub>22</sub>H<sub>41</sub>NO<sub>12</sub>P<sup>-</sup>, in extracts of WT and *acd-11(5878)* mixed-stage  
58 cultures reared on WT *E. coli* or *E. coli*  $\Delta$ *cfa*, as indicated. GLEA-becyp#1 is abundant in *acd-*  
59 *11(n5878)* mutants reared on WT *E. coli*.

60 **F)** MS/MS spectrum (negative ion mode) of GLEA-becyp#1 with major fragmentation reactions  
61 and product ions.

62 **G)** Volcano plots for 85 fatty acids detected by HPLC-HRMS (negative ion, post-column ion  
63 pairing) in the *endo*-metabolomes of WT or *acd-11(n5878)* mutant *C. elegans* fed WT *E. coli*  
64 as compared to  $\Delta$ *cfa* *E. coli*. *P*-values were calculated by unpaired, two-sided Welch's t-test; no  
65 adjustments were made for multiple comparisons. Odd-chain singly unsaturated fatty acids  
66 containing the cyclopropane moiety were detected only in animals fed WT *E. coli*, and becyp#1  
67 was enriched only in *acd-11(n5878)*. Vaccenic (18:1n7) and palmitoleic acid (16:1n7) were  
68 increased in animals reared on  $\Delta$ *cfa* *E. coli*, consistent with a previous report<sup>48</sup>. In addition, a  
69 specific subset of PUFAs was enriched in animals fed  $\Delta$ *cfa* *E. coli*, e.g., 18:5 and 22:6, some of  
70 which have been previously observed in fatty acid desaturation mutants that accumulate  
71 palmitoleic acid<sup>50</sup>.

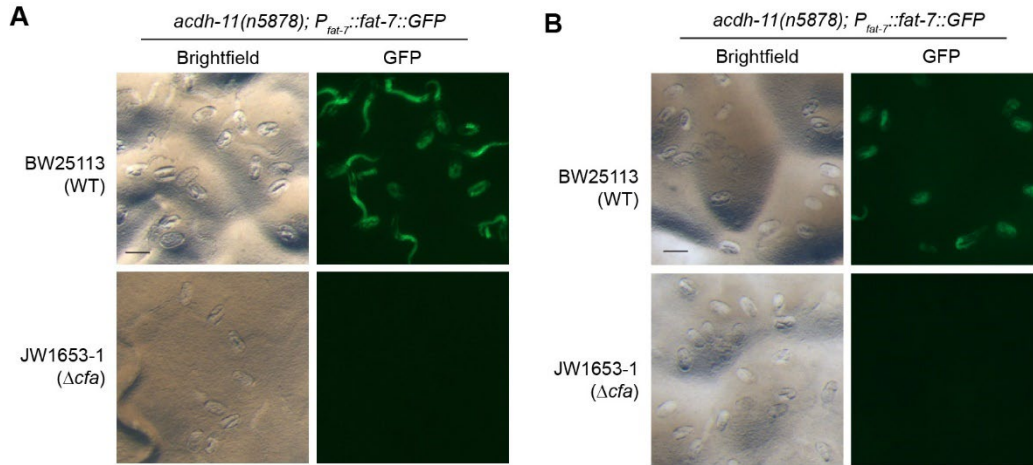

72

73 **Supplementary Fig. 3. FAT-7::GFP expression in eggs of *acdH-11* mutants is dependent on**  
 74 **parental diet.**

75 **A)** Representative brightfield and fluorescence micrographs of eggs of *acdH-11(n5878);P<sub>fat-7</sub>::fat-*  
 76 *7::GFP* mutants reared on BW25113 (WT) or JW1653-1 ( $\Delta cfa$ ) *E. coli* for four generations at 20  
 77 °C. The scale bar represents 0.05 mm. Six independent experiments were performed.

78 **B)** Representative brightfield and fluorescence micrographs of eggs of *acdH-11(n5878);P<sub>fat-7</sub>::fat-*  
 79 *7::GFP* mutants reared on BW25113 (WT) or JW1653-1 ( $\Delta cfa$ ) *E. coli* for four generations, then  
 80 switched to the other bacterial diet, maintained at 20 °C. Eggs and larvae had high levels of FAT-  
 81 7::GFP when the parental generation was reared on WT *E. coli*. The scale bar represents 0.05  
 82 mm. Three independent experiments were performed.

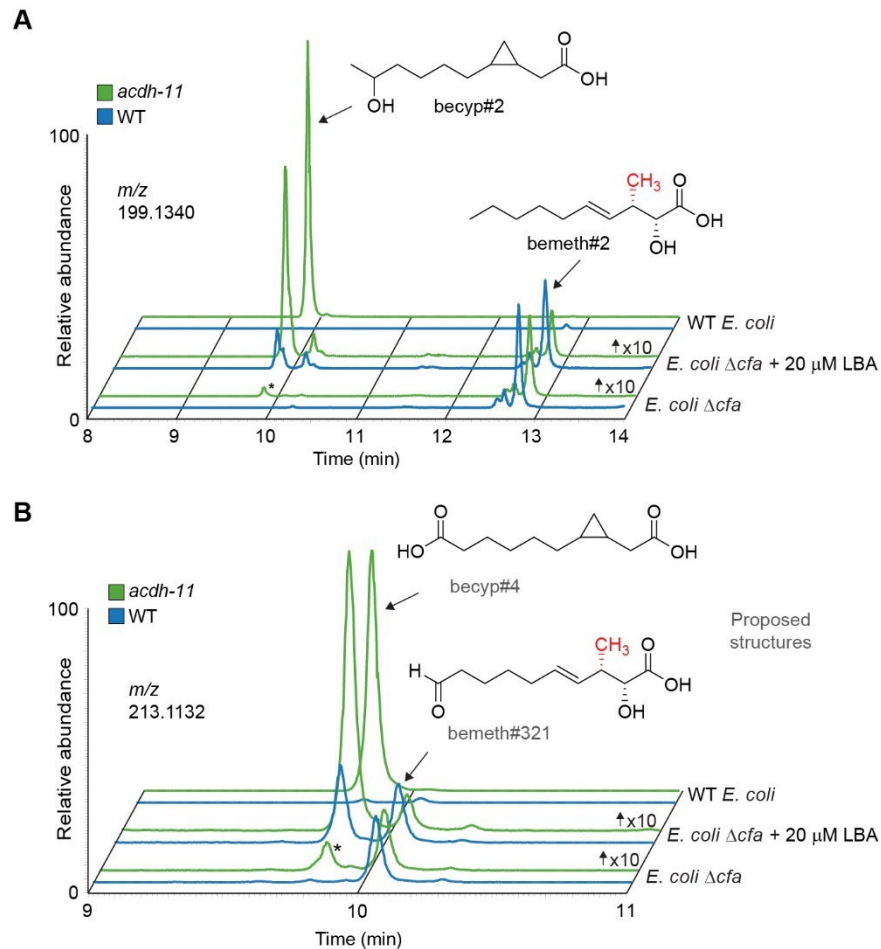

83

84 **Supplementary Fig. 4. Supplementation with lactobacillic acid (LBA) restores  $\beta$ CPFAs.**

85 **A)** EICs for  $m/z$  199.1340, corresponding to becyp#2, bemeth#2, and structural isomers of  
 86  $C_{11}H_{19}O_3^-$ , in extracts of WT and *acdH-11*(n5878) mixed-stage cultures reared on WT *E. coli*, *E.*  
 87 *coli*  $\Delta cfa$  supplemented with 20  $\mu M$  LBA (see Fig. 2), or *E. coli*  $\Delta cfa$ , as indicated. becyp#2 is  
 88 strongly enriched in *acdH-11* mutants fed WT *E. coli*, abolished in animals fed *E. coli*  $\Delta cfa$ , and  
 89 partially restored in animals fed *E. coli*  $\Delta cfa$  supplemented with 20  $\mu M$  LBA, whereas bemeth#2 is  
 90 unaffected. An unknown isomer is marked with an asterisk. Y-axes are scaled as indicated to  
 91 clearly show traces.

92 **B)** EICs for  $m/z$  213.1123, corresponding to becyp#4, bemeth#321, and structural isomers of  
 93  $C_{11}H_{17}O_4^-$ , in extracts of WT and *acdH-11*(n5878) mixed-stage cultures reared on the same diets  
 94 as above. Levels of becyp#4 are partially restored by feeding LBA, whereas bemeth#321 is  
 95 unaffected. An unknown isomer is marked with an asterisk. Y-axes are scaled as indicated to  
 96 clearly show traces.

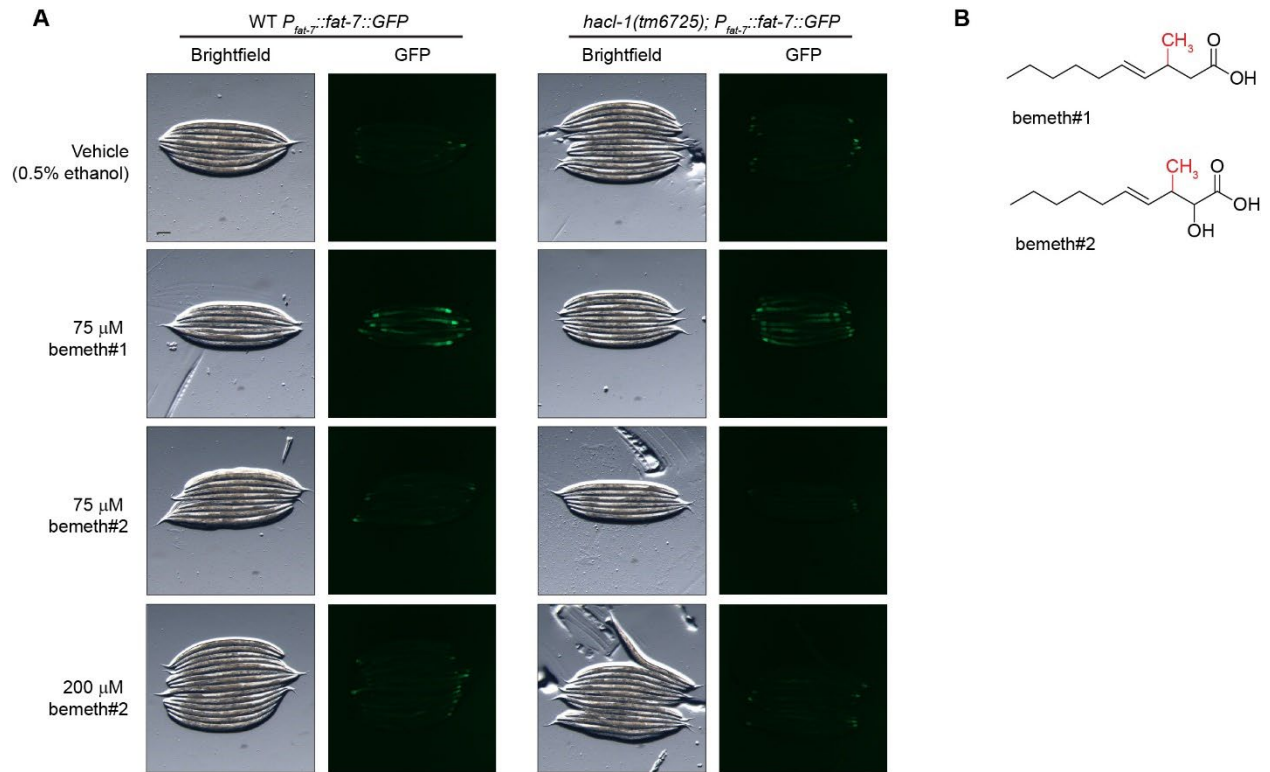

97

98 **Supplementary Fig. 5. FAT-7::GFP is not induced in *hacI-1* mutants nor following**  
 99 **supplementation with bemeth#2.**

100 **A)** Representative brightfield and GFP fluorescence micrographs of  $P_{fat-7}::fat-7::GFP$  and  $hacI-$   
 101  $1(tm6725);P_{fat-7}::fat-7::GFP$  adults reared at 25 °C supplemented with vehicle (0.5% ethanol),  
 102 bemeth#1, or bemeth#2, as indicated. Scale bar represents 0.1 mm. Supplementation with  
 103 bemeth#2 does not cause overt changes in the abundance of FAT-7::GFP in either genotype.  
 104 Four independent experiments were performed.

105 **B)** Chemical structures of bemeth#1 and its  $\alpha$ -hydroxylated derivative, bemeth#2. Several  $\alpha$ -  
 106 hydroxylated  $\beta$ MFAs accumulate in *hacI-1* mutants but do not cause increased *fat-7* expression.

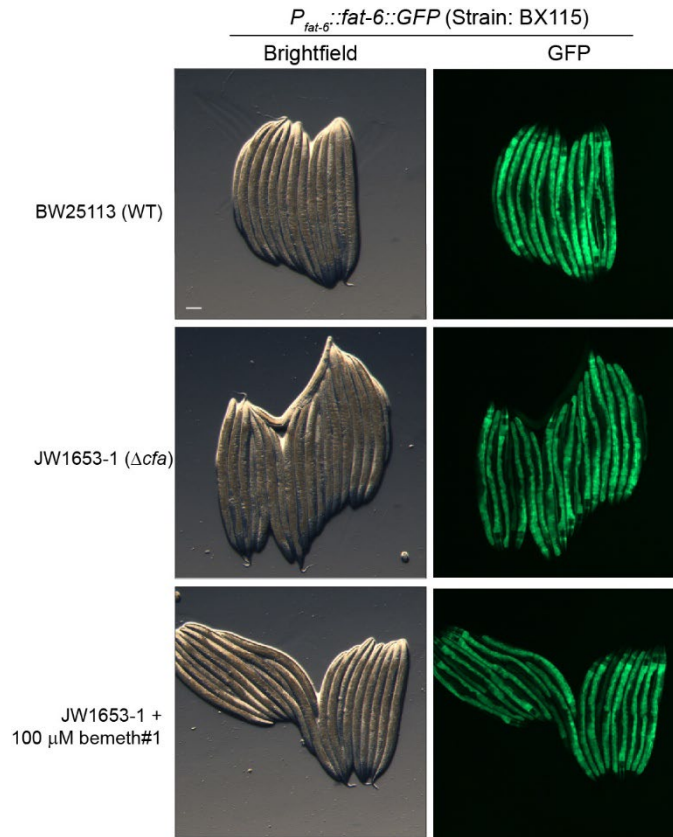

107

108 **Supplementary Fig. 6. bemeth#1 supplement does not change FAT-6::GFP.**

109 Representative brightfield and fluorescence micrographs of *P<sub>fat-6</sub>::fat-6::GFP* animals reared on  
 110 BW25113 (WT), JW1653-1 ( $\Delta cfa$ ), or JW1653-1 *E. coli* supplemented with 100  $\mu$ M bemeth#1. No  
 111 FAT-6::GFP induction was observed under supplementation conditions. The scale bar represents  
 112 0.1 mm. Three independent experiments were performed.



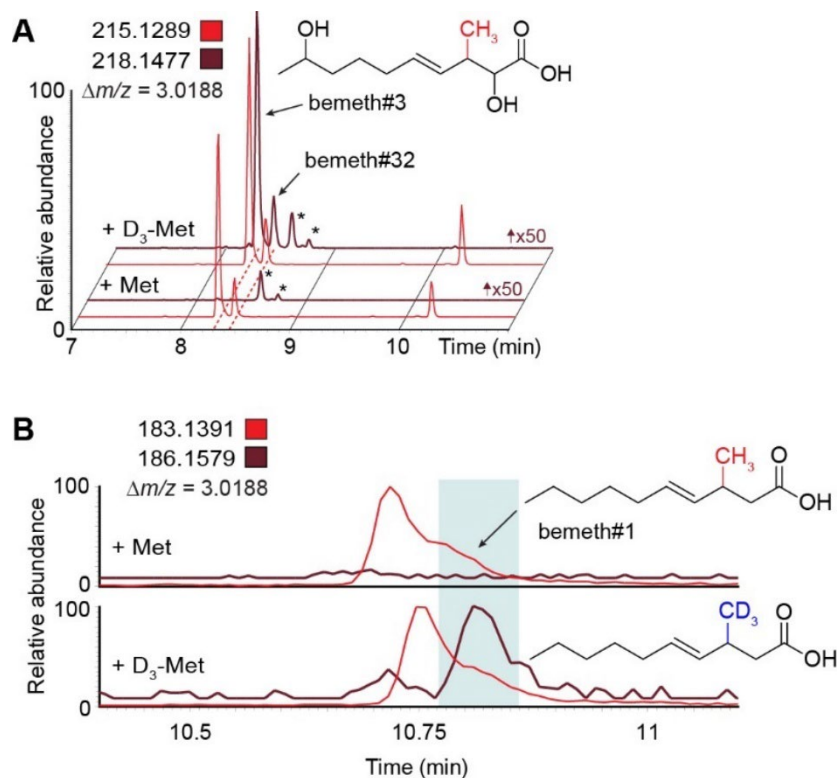

113

114 **Supplementary Fig. 7. D<sub>3</sub>-methyl is incorporated in  $\beta$ MFAs.**

115 **A)** EICs for  $m/z$  215.1289 and 218.1477, corresponding to  $C_{11}H_{19}O_4^-$  and  $D_3-C_{11}H_{16}O_4^-$ , from *exo*-  
 116 metabolome extracts of *hacl-1(tm6725)* larvae supplemented with methionine (Met) or D<sub>3</sub>-methyl-  
 117 methionine (D<sub>3</sub>-Met). Red dashed lines highlight bemeth#3 stereoisomers with D<sub>3</sub>-enrichment. EIC  
 118 Y-axis for  $m/z$  218.1477 is scaled 50-fold to clearly show traces for labeled features. Asterisks  
 119 mark unrelated features present in both Met- and D<sub>3</sub>-Met-supplemented samples.

120 **B)** EICs for  $m/z$  183.1391 and 186.1579, corresponding to  $C_{11}H_{19}O_2^-$  and  $D_3-C_{11}H_{16}O_2^-$ , from *endo*-  
 121 metabolome extracts of *hacl-1(tm6725)* larvae supplemented with Met or D<sub>3</sub>-Met. Under these  
 122 chromatographic conditions, bemeth#1 elutes as a shoulder of an unidentified isobaric compound  
 123 (undecenoic acid). Blue box highlights D<sub>3</sub>-enrichment in later-eluting bemeth#1, which was  
 124 resolved from the earlier metabolite via method optimization (see **Fig. 3B**).

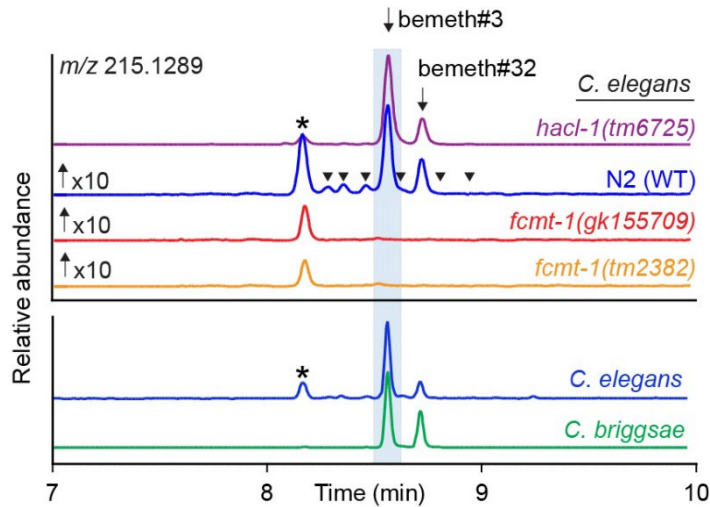

125

126 **Supplementary Fig. 8.  $\beta$ MFAs are detected in *C. briggsae*.**

127 EICs for  $m/z$  215.1289, corresponding to bemeth#3 and isomers of  $C_{11}H_{19}O_4^-$ , in extracts of *hacl-*  
 128 *1(tm6725)*, N2 (WT), *fcmt-1(gk155709)*, and *fcmt-1(tm2382)*, as well as in independently grown *C.*  
 129 *elegans* and *C. briggsae* cultures, as indicated. bemeth#3 and its stereoisomer (bemeth#32) are  
 130 marked with arrows and detected in *C. elegans* and *C. briggsae*, enriched in *hacl-1* but not  
 131 detected in *fcmt-1* mutants. An unrelated FCMT-1-independent isomer is marked with an asterisk  
 132 (\*). Additional minor isomers in *C. elegans* are marked with arrowheads. Y-axes are scaled as  
 133 indicated to clearly show traces.

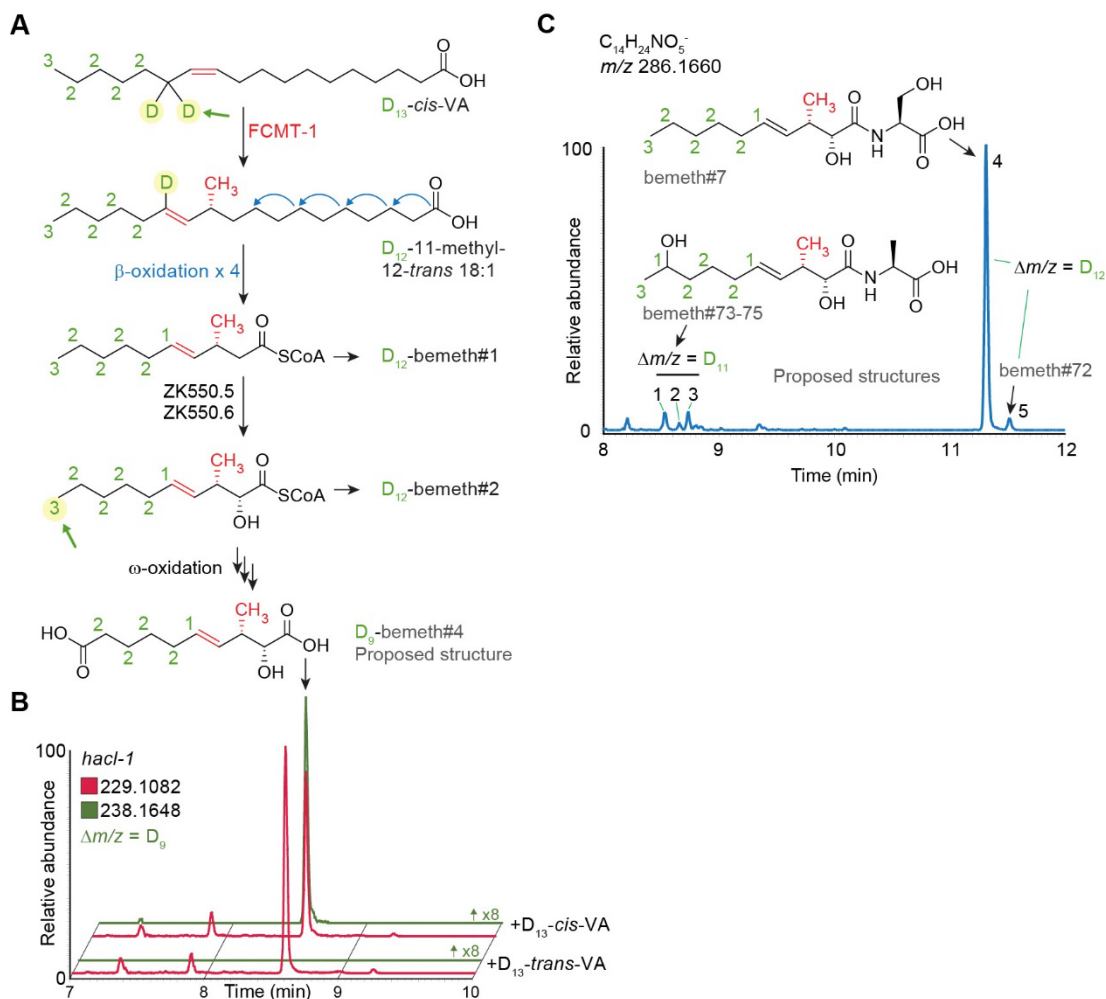

134

135 **Supplementary Fig. 9. Isotopic enrichment from *cis*- $D_{13}$ -vaccenic acid supplement**

136 **A)** Proposed biosynthesis of bemeth#1 based on isotopically labeled  $D_{13}$ -VA feeding experiment  
 137 (see **Fig. 5B**). The number of deuterium atoms on each carbon is labeled green. Methyl transfer  
 138 results in abstraction of one deuterium atom (highlighted with green arrow) and distal oxidation  
 139 (highlighted with green arrow) results in metabolites with a diagnostic number of deuterium atoms  
 140 remaining.

141 **B)** EICs for  $m/z$  229.1082 and 238.1648, corresponding to bemeth#4 and  $D_9$ -bemeth#4,  
 142 respectively, in extracts of *hacl-1* mixed-stage cultures supplemented with  $D_{13}$ -*cis*- or  $D_{13}$ -*trans*-  
 143 VA. Oxidation of the  $\omega$ -carbon results in the loss of three additional deuterium atoms, for a total  
 144 loss of four deuterium atoms and a diagnostic isotope label. Y-axis for  $m/z$  238.1648 is scaled 8-  
 145 fold to clearly show traces for labelled features.

146 **C)** EIC for  $m/z$  286.1660, corresponding to  $C_{14}H_{25}NO_5^-$ , in extract of N2 (WT) mixed-stage culture  
 147 supplemented with  $D_{13}$ -*cis*-VA. Earlier eluting isomers are  $D_{11}$ -enriched (bemeth#73-75), whereas  
 148 later eluting isomers are  $D_{12}$ -enriched (bemeth#7, bemeth#72). Representative structures  
 149 proposed based on isotope labeling and MS/MS fragmentation.

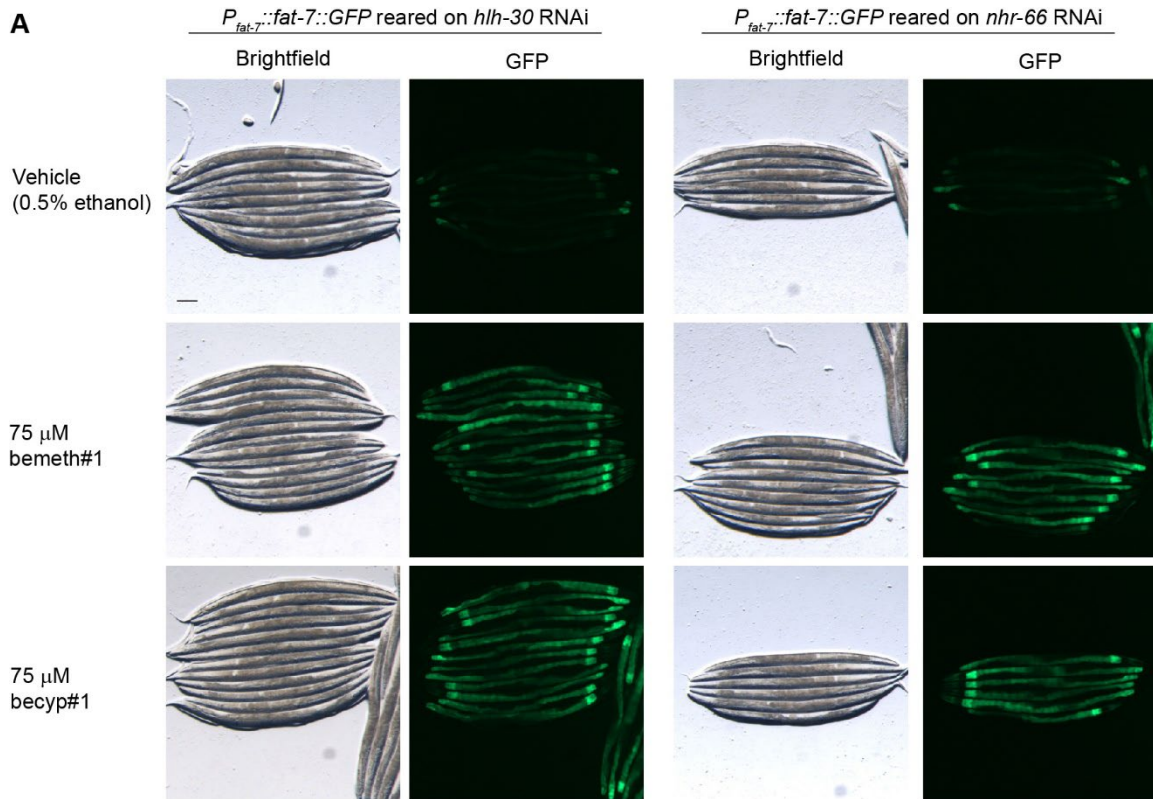

150

151 **Supplementary Fig. 10. FAT-7::GFP induction is independent of *hlh-30* and *nhr-66*.**

152 **A)** Representative brightfield and fluorescence micrographs of *P<sub>fat-7</sub>::fat-7::GFP* animals reared on  
 153 HT115 expressing *hlh-30* or *nhr-66* RNAi and supplemented with vehicle only (0.5% ethanol), 75  
 154  $\mu$ M bemeth#1, or 75  $\mu$ M becyp#1. Animals were supplemented in parallel with animals reared on  
 155 HT115 expressing L4440 (vector control), see **Fig. 5**. Scale bar represents 0.1 mm. Five  
 156 independent experiments were performed.

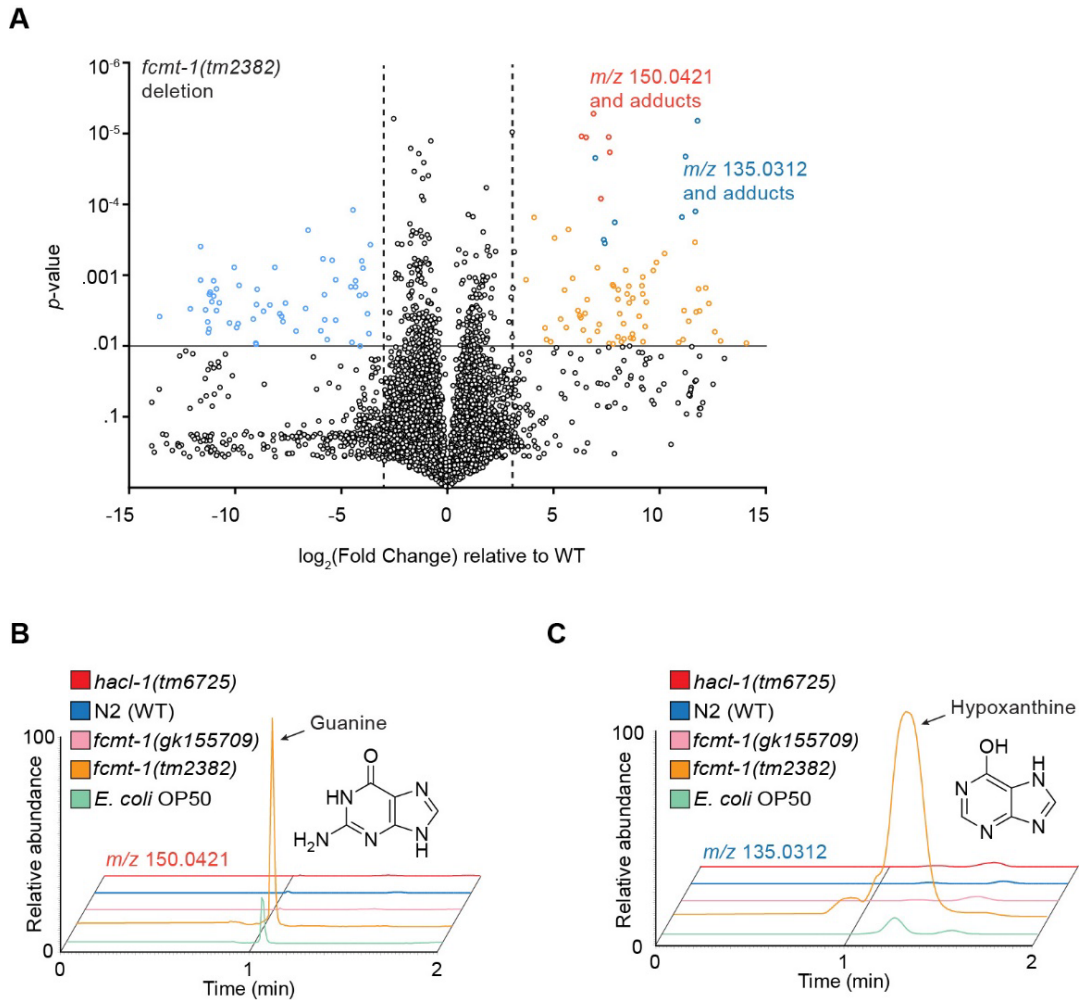

157

158 **Supplementary Fig. 11. Unique metabolites enriched in *fcmt-1(tm2382)***

159 **A)** Volcano plot for subset of features detected by HPLC-MS (negative ion) in the *exo*-metabolome  
 160 of *fcmt-1(tm2382)* relative to wildtype (N2) control. *P*-values were calculated by unpaired, two-  
 161 sided Welch's t-test; no adjustments were made for multiple comparisons. Red points represent  
 162 *m/z* 150.0421, including isotopes and adducts, corresponding to guanine; blue points represent  
 163 *m/z* 135.0312, corresponding to hypoxanthine. Both metabolites were confirmed by commercial  
 164 standards.

165 **B)** Representative EICs for *m/z* 150.0421, corresponding to guanine, in *exo*-metabolome extracts  
 166 of synchronized adult N2 (WT), *hacl-1(tm6725)*, *fcmt-1(gk155709)*, and *fcmt-1(tm2382)* animals,  
 167 or from extract of *E. coli* OP50 only (bacterial diet).

168 **C)** Representative EICs for *m/z* 135.0312, corresponding to hypoxanthine, in *exo*-metabolome  
 169 extracts of synchronized adult N2 (WT), *hacl-1(tm6725)*, *fcmt-1(gk155709)*, and *fcmt-1(tm2382)*  
 170 animals, or from extract of *E. coli* OP50 only (bacterial diet).

171

172 **Supplementary Methods**

173 **General synthetic procedures.**

174 Unless stated otherwise, all reactions were carried out under argon (Ar) atmosphere in flame-dried  
175 glassware. All commercially available reagents were used as purchased unless otherwise stated.  
176 All solvents were dried over activated 3Å molecular sieves for a minimum of 24 hours unless used  
177 in reactions containing aqueous reagents. Solutions and solvents sensitive to moisture and  
178 oxygen were transferred via standard syringe and cannula techniques. Reactions were cooled  
179 with ice-water or dry ice-acetone baths or heated with mineral oil baths depending on reaction  
180 temperature. Titanium (IV) isopropoxide was distilled under vacuum and stored under argon. Thin-  
181 layer chromatography (TLC) was performed with J.T. Baker Silica Gell IB2-F plastic-backed plates  
182 with analysis via UV and p-anisaldehyde stain. Flash chromatography was performed using  
183 Teledyne ISCO CombiFlash Rf and Rf+ systems with Teledyne ISCO RediSep Rf and Rf Gold  
184 silica columns. All deuterated solvents were purchased from Cambridge Isotopes. Nuclear  
185 Magnetic Resonance (NMR) spectra were recorded on a Varian INOVA 600 (600 MHz) or Bruker  
186 AV 500 (500 MHz) in the Cornell University NMR Facility. <sup>1</sup>H NMR chemical shifts are reported in  
187 ppm (δ) relative to the residual solvent peaks (7.26 ppm for CDCl<sub>3</sub> and 3.31 ppm for CD<sub>3</sub>OD) and  
188 <sup>13</sup>C NMR shifts relative to their respective residual solvent peaks (77.16 for CDCl<sub>3</sub> and 49.00 for  
189 CD<sub>3</sub>OD). NMR-spectroscopic data are reported as follows: chemical shift, multiplicity (s = singlet,  
190 d = doublet, t = triplet, q = quartet, m = multiplet, br = broad), coupling constants (Hz), and  
191 integration and often tabulated including 2D NMR data. All NMR data processing was done using  
192 MNOVA 12.0.1 (<https://mestrelab.com/>).

193

194 **Chemical syntheses**

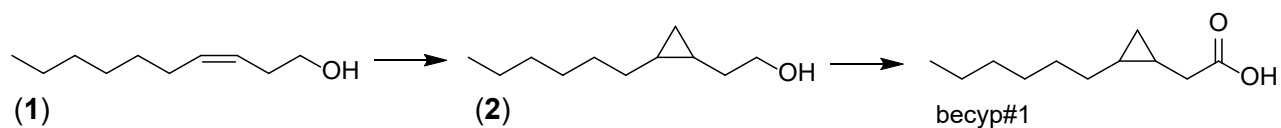

195  
 196 ***cis*-3,4-methylenedecanoic acid, becp#1.** From an 8:1 *cis*:*trans* solution of **1** (40 mg, 0.256  
 197 mmol, 1.00 equiv.) in 1.5 mL DCM was added Zn(Et)<sub>2</sub> (1M in hexanes, 1.28 mL, 1.28 mmol, 5.00  
 198 equiv.). The solution was cooled to 0 °C followed by the addition of CH<sub>2</sub>I<sub>2</sub> (102 μL, 1.28 mmol, 5.00  
 199 equiv.). The resulting suspension was allowed to reach room temp with stirring and remained at  
 200 room temp. overnight. The yellow mixture was directly purified via flash column chromatography  
 201 on silica gel using a gradient of 5-100% EtOAc in hexanes, affording cyclopropyl alcohol  
 202 intermediate (**2**, 40 mg) with some uncharacterized impurities. To a solution of the cyclopropyl  
 203 alcohol intermediate (**2**, 10 mg) in 1 mL of acetone at 0 °C was added 6 drops of freshly prepared  
 204 Jones reagent (enough to maintain an orange color). The solution was stirred at 0 °C for 1 hr and  
 205 then directly purified via flash column chromatography on silica gel using a gradient of 5-100%  
 206 EtOAc in hexanes, affording becp#1 (8 mg, 69% over two steps) as a colorless oil, determined as  
 207 a mixture of 8:1 *cis* : *trans* isomers.

208 **<sup>1</sup>H NMR (600 MHz, chloroform-*d*):** δ 2.42 (dd, *J* = 16.6, 7.0 Hz, 1H), 2.30 (dd, *J* = 16.6, 7.6 Hz,  
 209 1H), 1.44 – 1.20 (m, 10H), 1.15 (m, 1H), 1.09 (m, 1H), 0.88 (t, *J* = 6.8 Hz, 3H), 0.74 (td, *J* = 8.4,  
 210 4.6 Hz, 1H), -0.11 (q, *J* = 5.2 Hz, 1H). These chemical shifts were nearly identical to those  
 211 previously reported<sup>1</sup>.

212 **<sup>13</sup>C NMR (126 MHz, chloroform-*d*):** δ 180.1, 33.8, 32.2, 30.0, 29.4, 28.9, 22.8, 15.6, 14.2, 11.3,  
 213 11.

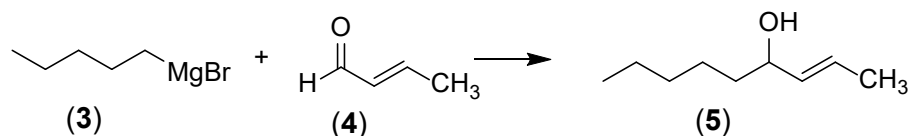

214  
 215 **(*E*)-4-Hydroxy-non-2-ene (5).** *n*-Pentylmagnesium bromide (**3**, 10 mL, 20 mmol in THF) was  
 216 added to a diethyl ether (20mL) at 0 °C under an argon atmosphere. Crotonaldehyde (**4**, 1.66  
 217 mL, 20 mmol) was added to the stirring solution over 10 minutes via an addition funnel and  
 218 stirred for one hour. The reaction was quenched with saturated aqueous NH<sub>4</sub>Cl (20 mL) and  
 219 extracted with EtOAc (3×20 mL). The combined organics were dried over MgSO<sub>4</sub>, filtered, and  
 220 concentrated under reduced pressure. The resulting liquid was purified by flash chromatography  
 221 on silica gel. Elution with a gradient of 0-20% EtOAc/Hexanes gave the resulting alcohol (**5**) (2.61  
 222 g, 92%) as a colorless liquid<sup>2</sup>.

223 **<sup>1</sup>H NMR (CDCl<sub>3</sub>, 500 MHz):** δ (ppm) 5.65 (dq<sub>d</sub> 15.3, 6.5, 0.8 Hz, 1H), 5.48 (dd<sub>q</sub> 15.3, 7.7, 1.5  
224 Hz, 1H), 4.03 (q, 6.6 Hz, 1H), 1.70 (dd 6.5, 1.3 Hz, 3H), 1.25-1.58 (m, 9H), 0.89 (t, 6.8 Hz, 3H).  
225 **<sup>13</sup>C NMR (CDCl<sub>3</sub>, 125 MHz):** δ (ppm) 134.5, 126.9, 73.4, 37.4, 31.9, 25.3, 22.8, 17.8, 14.2.  
226 (2) (ESI) *m/z*: Calculated: (M+H)<sup>+</sup> 143.1430. Actual: 143.1428 Δ ppm: -1.64

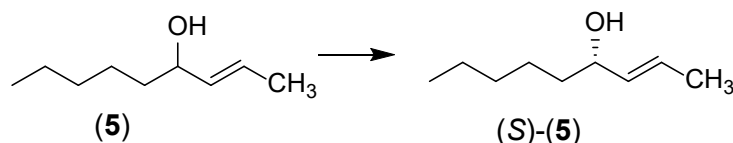

227  
228 **(S,E)-4-Hydroxy-non-2-ene ((S)-5).** (-)-Diisopropyl D-tartrate (183 μL, 0.88 mmol) was added to  
229 a suspension of powdered 4 Å molecular sieves (0.4 g) in DCM (21 mL) at ambient temperature  
230 under an argon atmosphere. The solution was cooled to -20 °C and titanium (IV) isopropoxide  
231 (212 μL, 0.7 mmol) was added. The solution was stirred for one hour and *tert*-butylhydroperoxide  
232 (382 μL, 2.1 mmol in decane) added. The solution was further stirred for 30 minutes and cooled to  
233 -40 °C, upon which racemic (*E*)-4-hydroxy-non-2-ene (5) (3.5 mL, 3.5 mmol in DCM) was added  
234 dropwise. After 20 hours the reaction was quenched with (-)-diisopropyl D-tartrate (366 μL, 1.75  
235 mmol) in water (7 mL). The layers were separated, and the aqueous solution extracted with Et<sub>2</sub>O  
236 (3×20 mL). The combined organics were washed with saturated aqueous NaHCO<sub>3</sub>, dried over  
237 MgSO<sub>4</sub>, filtered, and concentrated under reduced pressure. The resulting liquid was purified by  
238 flash chromatography on silica gel as above, yielding chiral alcohol (S)-5 (236 mg, 94%) as a  
239 colorless liquid<sup>3</sup>. Enantiomeric excess was determined to be up to 88% by Mosher derivatization<sup>4</sup>.  
240 All NMR spectra and mass spectrometric data are identical to racemic alcohol (5).

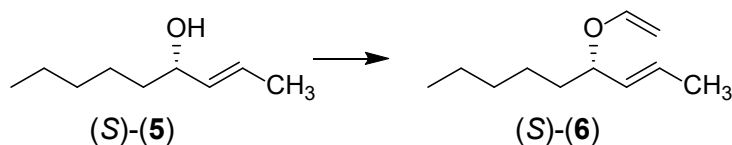

241 **(S,E)-4-(Vinyloxy)-non-2-ene ((S)-6).** (*S,E*)-4-Hydroxy-non-2-ene ((S)-5, 307 mg, 2.16 mmol)  
242 was added to ethyl vinyl ether (5.75 mL, 60.5 mmol) at ambient temperature under an argon  
243 atmosphere. Mercury (II) acetate (688 mg, 2.16 mmol) was added to the solution<sup>5</sup>. After two  
244 hours AcOH (302 μL) was added with stirring. After 30 minutes the reaction was diluted with  
245 hexanes (45 mL) and washed with 5% aqueous KOH (4.5 mL). The organics were dried over  
246 MgSO<sub>4</sub>, filtered, and concentrated under reduced pressure. The resulting liquid was purified by  
247 flash chromatography on alumina. Elution with a gradient of 0-10% EtOAc/Hexanes yielded vinyl  
248 ether ((S)-6, 178 mg, 76% BRSM) as a colorless liquid.



249 **<sup>1</sup>H NMR (CDCl<sub>3</sub>, 500 MHz)** δ (ppm) 6.31 (dd, 14.1, 6.6 Hz, 1H), 5.65 (dq, 15.3, 6.6, 0.8 Hz,  
250 1H), 5.38 (ddq, 15.3, 7.6, 1.6 Hz, 1H), 4.28 (dd, 14.1, 1.4 Hz, 1H), 4.05 (q, 7 Hz, 1H), 3.96 (dd, 6.6,  
251 1.4 Hz, 1H), 1.71 (dd, 6.5, 1.4 Hz, 3H), 1.61-1.70 (m, 1H), 1.46-1.54 (m, 1H), 1.23-1.40 (m, 6H),  
252 0.88 (t, 6.8 Hz, 3H).

253 **<sup>13</sup>C NMR (CDCl<sub>3</sub>, 125 MHz)** δ (ppm) 151.0, 131.4, 128.7, 88.4, 81.2, 35.3, 31.8, 25.0, 22.7, 17.9,  
254 14.2.

255 **HRMS (ESI) *m/z***: Calculated: (M+H)<sup>+</sup> 169.1587 (M+Na)<sup>+</sup> 191.1406. Actual: 169.1584 Δ ppm: -  
256 1.99

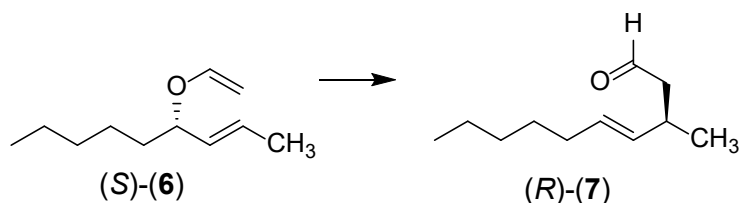

257  
258 **(*R,E*)-3-Methyl-dec-4-enal ((*R*)-7)**. Vinyl ether ((*S*)-6, 107 mg, 0.64 mmol) was added to toluene  
259 (5 mL) and stirred with condenser at reflux under an argon atmosphere. After 23 hours the  
260 reaction was concentrated to yield aldehyde ((*R*)-7, 100 mg, 93%) as a colorless liquid which was  
261 used without purification<sup>5-7</sup>.

262 **<sup>1</sup>H NMR (CDCl<sub>3</sub>, 500 MHz)** δ (ppm) 9.72 (t, 2.4 Hz, 1H), 5.44 (dtd, 15.4, 6.6, 1.0 Hz, 1H), 5.34  
263 (dtd, 15.4, 7.0, 1.3 Hz, 1H), 2.72 (m, 6.9 Hz, 1H), 2.40 (ddd, 16.0, 7.3, 2.4 Hz, 1H), 2.33 (ddd, 16.0,  
264 6.7, 2.4 Hz, 1H), 1.97 (q, 7.0 Hz, 2H), 1.21-1.37 (m, 6H), 1.06 (d, 6.8 Hz, 3H), 0.88 (t, 7.0 Hz, 3H).

265 **<sup>13</sup>C NMR (CDCl<sub>3</sub>, 125 MHz)** δ (ppm) 203.0, 133.9, 130.2, 50.7, 32.6, 31.8, 31.5, 29.3, 22.7, 20.9,  
266 14.2.

267 **HRMS (ESI) *m/z***: Calculated: (M+Na)<sup>+</sup> 191.1406. Actual: 191.1411 Δ ppm: 2.49

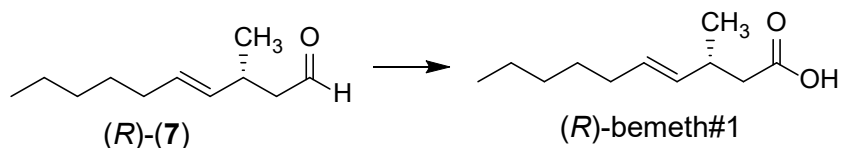

268  
269 **(*R,E*)-3-Methyl-dec-4-enoic acid, (*R*)-bemeth#1**. Aldehyde ((*R*)-13, 53 mg, 0.32 mmol) was  
270 dissolved in DMSO (1.1 mL) and stirred under ambient atmosphere. Sodium chlorite (40 mg, 0.35  
271 mmol) was dissolved in minimal water and the pH adjusted to ~4.5 with NaH<sub>2</sub>PO<sub>4</sub>. The aqueous  
272 solution was added to the aldehyde and the reaction stirred in an open atmosphere. After 30  
273 minutes, more sodium chlorite was added to the reaction (20 mg, 0.18 mmol) dissolved in water  
274 and buffered as above. After 45 minutes the reaction was diluted with water (2 mL) and extracted



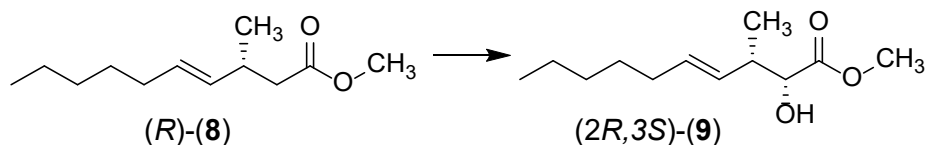

306

307 **Methyl-(2R,3S,E)-2-hydroxy-3-methyl-dec-4-enoate ((2R,3S)-9).** *n*-Butyl lithium (72  $\mu\text{L}$ , 0.18  
 308 mmol) was added dropwise to a stirring solution of *N,N*-diisopropylamine (21  $\mu\text{L}$ , 0.15 mmol) in  
 309 THF (4 mL) at  $-15^\circ\text{C}$  and stirred 10 minutes under an argon atmosphere. The solution was cooled  
 310 to  $-78^\circ\text{C}$  and methyl ester ((*R*)-8) was added and the reaction stirred at  $-15^\circ\text{C}$  for 15 minutes. The  
 311 reaction was cooled to  $-78^\circ\text{C}$  and (+)-8, 8-dichlorocamphorylsulfonyl oxaziridine (90 mg, 0.3  
 312 mmol) was added in THF (2 mL) and stirred to  $-15^\circ\text{C}$ . After stirring for one hour, the reaction was  
 313 quenched with aqueous saturated  $\text{NaHCO}_3$  (3 mL) and the layers separated. The aqueous layer  
 314 was extracted with DCM (3 $\times$ 5mL) and the combined organics dried over  $\text{MgSO}_4$ , filtered, and  
 315 concentrated under reduced pressure. The resulting oil was purified by flash chromatography on  
 316 silica gel. Elution with a gradient of 0-20% EtOAc/hexanes yielded alpha-hydroxy ester ((*2R,3S*)-9,  
 317 9 mg, 69% BRSM).

318  **$^1\text{H NMR}$  (CDCl<sub>3</sub>, 500 MHz)**  $\delta$  (ppm) 5.53 (dtd, 15.3, 6.7, 0.9 Hz, 1H), 5.39 (ddt, 15.3, 7.9, 1.4 Hz,  
 319 1H), 4.12 (d, 4.2, 1H), 3.78 (s, 3H), 3.76 (q, 4.3 Hz, 1H), 2.52-2.67 (m, 1H), 2.00 (qd, 7.1, 1.2 Hz,  
 320 2H), 1.21-1.38 (m, 8H), 0.99 (d, 7.0, 3H), 0.88 (t, 6.9, 3H).

321  **$^{13}\text{C NMR}$  (CDCl<sub>3</sub>, 125 MHz)**  $\delta$  (ppm) 174.8, 132.4, 130.6, 74.6, 52.4, 41.3, 32.7, 31.5, 29.2, 22.7,  
 322 14.8, 14.2.

323 **HRMS (ESI) *m/z*:** Calculated:  $(\text{M}+\text{Na})^+$  237.1461. Actual: 237.1475.  $\Delta$  ppm: 5.87.

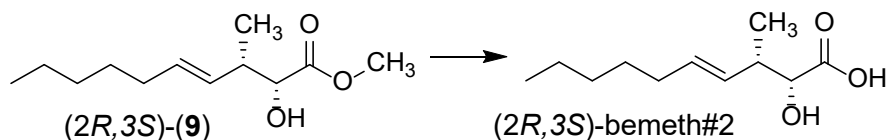

324

325 **(2R,3S,E)-2-hydroxy-3-methyl-dec-4-enoic acid, (2R,3S)-bemeth#2.** Lithium hydroxide (40 mg,  
 326 2 mmol) was added to a stirring solution of ester ((*2R,3S*)-9, 11 mg, 0.05 mmol) in MeOH (0.4  
 327 mL), THF (0.4 mL), and water (0.2 mL). After one hour, the reaction was acidified with 1 M HCl  
 328 and extracted with DCM (3 $\times$ 5 mL). The combined organics were dried over  $\text{MgSO}_4$ , filtered, and  
 329 concentrated under reduced pressure. The resulting oil was purified by flash chromatography on  
 330 silica gel. Elution with a gradient of 0-100% DCM/MeOH(0.1% AcOH) yielded alpha-hydroxy acid  
 331 (*2R,3S*)-bemeth#2 (8.6 mg, 86% BRSM, d.r. 67.8% as determined by Mosher analysis<sup>9</sup>).

332  **$^1\text{H NMR}$  (CDCl<sub>3</sub>, 500 MHz)**  $\delta$  (ppm) 5.58 (dt, 15.4, 6.8 Hz, 1H), 5.42 (dd, 15.4, 7.6 Hz, 1H), 4.22  
 333 (d, 3.6, 1H), 2.68 (m, 1H), 2.02 (q, 6.9 Hz, 2H), 1.22-1.40 (m, 6H), 1.05 (d, 7.0, 3H), 0.89 (t, 6.7,  
 334 3H).

335 <sup>13</sup>C NMR (CDCl<sub>3</sub>, 125 MHz) δ (ppm) 177.4, 133.1, 130.1, 74.2, 40.7, 32.7, 31.5, 29.2, 22.7, 14.3,  
 336 14.2  
 337 HRMS (ESI) *m/z*: Calculated: (M-H)<sup>-</sup> 199.1340. Actual: 199.1339. Δ ppm: -0.28.

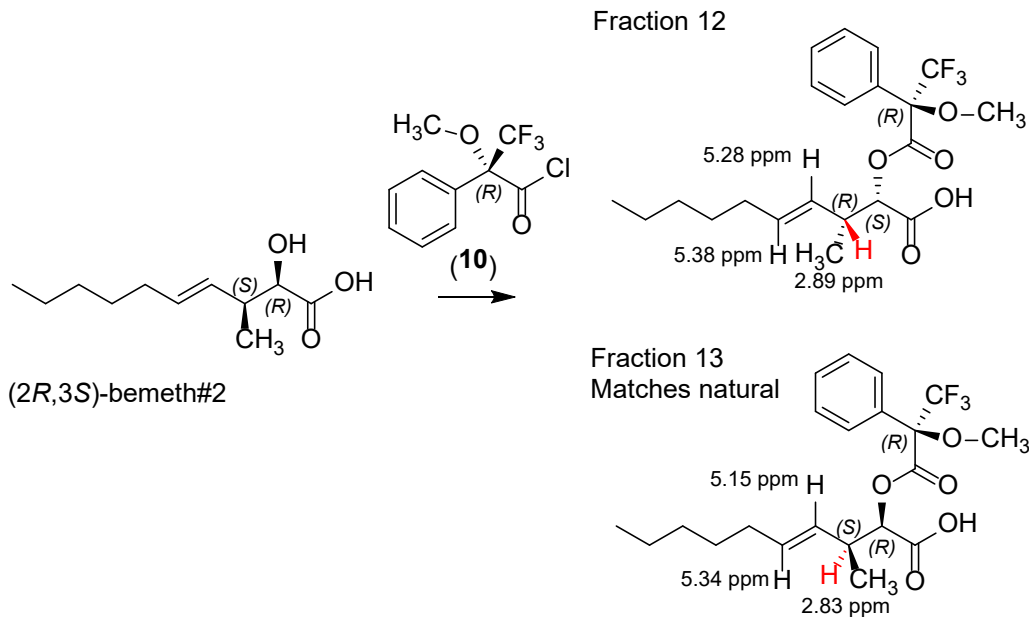

338  
 339 **Determination of bemeth#2 stereochemistry.** bemeth#2 was dissolved in DCM with DMAP and  
 340 stirred under argon at ambient temperature. (*R*)-(+)-α-Methoxy-α-(trifluoromethyl)phenylacetyl  
 341 chloride (**10**, 1.2 equivalents) was added and the reaction stirred for 30 minutes and quenched with  
 342 MeOH. The reaction was concentrated under reduced pressure, taken up in MeOH, and analyzed  
 343 by HPLC-HRMS. Integration of the EIC after Mosher derivatization of synthetic bemeth#2 yielded  
 344 a diastereomeric enrichment of 68%.  
 345

## Supplementary Tables

**Supplementary Table 1. Metabolites enriched in *acdH-11(n5878)* mutants.** Subset of dereplicated metabolites that are i) at least 8-fold enriched in *acdH-11(n5878);P<sub>fat-7</sub>::fat-7::GFP* relative to WT *P<sub>fat-7</sub>::fat-7::GFP*, ii) mean intensity > 500,000 AU for *acdH-11*, iii) not detected in bacteria only, and iv) dependent on cyclopropane lipid biosynthesis in *E. coli*. These data were filtered using stringent criteria and hundreds of additional differential features were detected (not dereplicated) using mean intensity cutoff at 100,000 AU. Note: these metabolites were detected in *acdH-11(n5878)* animals reared on OP50, HB101, and BW25113.

| ES(-) Obs. <i>m/z</i> | RT (min) | Molecular Formula                                  | ES(-) Theor. <i>m/z</i> | <i>m/z</i> error (ppm) | SMID-DB # | Comments                                 |
|-----------------------|----------|----------------------------------------------------|-------------------------|------------------------|-----------|------------------------------------------|
| 242.10394             | 6.90     | C <sub>11</sub> H <sub>17</sub> NO <sub>5</sub>    | 242.10340               | 2.226                  |           |                                          |
| 171.06656             | 6.96     | C <sub>8</sub> H <sub>12</sub> O <sub>4</sub>      | 171.06628               | 1.592                  |           | likely dicarboxylate, Na adduct in ES(-) |
| 457.14896             | 7.14     | C <sub>17</sub> H <sub>31</sub> O <sub>12</sub> P  | 457.14804               | 2.013                  |           | endo                                     |
| 574.20697             | 7.19     | C <sub>25</sub> H <sub>38</sub> NO <sub>12</sub> P | 574.20589               | 1.881                  |           | endo                                     |
| 576.22237             | 7.32     | C <sub>25</sub> H <sub>40</sub> NO <sub>12</sub> P | 576.22154               | 1.449                  |           | endo                                     |
| 396.17978             | 7.47     | C <sub>16</sub> H <sub>32</sub> NO <sub>8</sub> P  | 396.17928               | 1.261                  |           | endo                                     |
| 427.13823             | 7.62     | C <sub>16</sub> H <sub>28</sub> O <sub>11</sub> P  | 427.13747               | 1.769                  |           |                                          |
| 215.12915             | 7.75     | C <sub>11</sub> H <sub>20</sub> O <sub>4</sub>     | 215.12888               | 1.225                  | becyp#32  |                                          |
| 229.10845             | 7.85     | C <sub>11</sub> H <sub>18</sub> O <sub>5</sub>     | 229.10815               | 1.331                  |           |                                          |
| 215.12920             | 7.94     | C <sub>11</sub> H <sub>20</sub> O <sub>4</sub>     | 215.12888               | 1.483                  | becyp#33  |                                          |
| 185.08227             | 7.95     | C <sub>9</sub> H <sub>14</sub> O <sub>4</sub>      | 185.08193               | 1.797                  |           | likely dicarboxylate, Na adduct in ES(-) |
| 227.09299             | 8.02     | C <sub>11</sub> H <sub>16</sub> O <sub>5</sub>     | 227.09250               | 2.131                  |           |                                          |
| 213.11365             | 8.12     | C <sub>11</sub> H <sub>18</sub> O <sub>4</sub>     | 213.11323               | 1.979                  |           | endo                                     |
| 576.22271             | 8.15     | C <sub>25</sub> H <sub>40</sub> NO <sub>12</sub> P | 576.22154               | 2.029                  |           | endo                                     |
| 213.11378             | 8.16     | C <sub>11</sub> H <sub>18</sub> O <sub>4</sub>     | 213.11323               | 2.591                  |           |                                          |
| 215.12918             | 8.18     | C <sub>11</sub> H <sub>20</sub> O <sub>4</sub>     | 215.12888               | 1.360                  | becyp#3   |                                          |
| 213.11380             | 8.18     | C <sub>11</sub> H <sub>18</sub> O <sub>4</sub>     | 213.11323               | 2.662                  |           |                                          |
| 439.13818             | 8.27     | C <sub>17</sub> H <sub>28</sub> O <sub>11</sub> P  | 439.13747               | 1.600                  |           | endo, MOGL                               |
| 229.10852             | 8.30     | C <sub>11</sub> H <sub>18</sub> O <sub>5</sub>     | 229.10815               | 1.630                  |           |                                          |
| 286.16662             | 8.31     | C <sub>14</sub> H <sub>25</sub> NO <sub>5</sub>    | 286.16600               | 2.179                  |           |                                          |
| 441.15367             | 8.35     | C <sub>17</sub> H <sub>30</sub> O <sub>11</sub> P  | 441.15312               | 1.239                  |           | endo, MOGL                               |
| 286.16672             | 8.38     | C <sub>14</sub> H <sub>25</sub> NO <sub>5</sub>    | 286.16600               | 2.528                  |           | formate adduct                           |
| 276.13761             | 8.38     | C <sub>13</sub> H <sub>24</sub> NO <sub>3</sub> Cl | 276.13720               | 1.509                  |           |                                          |
| 288.18226             | 8.41     | C <sub>14</sub> H <sub>27</sub> NO <sub>5</sub>    | 288.18165               | 2.143                  |           | formate                                  |

|           |       |                                                                  |              |       |          |                                          |
|-----------|-------|------------------------------------------------------------------|--------------|-------|----------|------------------------------------------|
|           |       |                                                                  |              |       |          | adduct                                   |
| 213.11378 | 8.47  | C <sub>11</sub> H <sub>18</sub> O <sub>4</sub>                   | 213.11323    | 2.591 |          | endo                                     |
| 591.17201 | 8.49  | C <sub>22</sub> H <sub>32</sub> N <sub>4</sub> O <sub>13</sub> P | 591.1708979  | 1.878 |          | endo                                     |
| 441.15376 | 8.54  | C <sub>17</sub> H <sub>30</sub> O <sub>11</sub> P                | 441.15312    | 1.451 |          | endo                                     |
| 254.14035 | 8.61  | C <sub>13</sub> H <sub>21</sub> NO <sub>4</sub>                  | 254.13978    | 2.243 |          |                                          |
| 405.17729 | 8.62  | C <sub>18</sub> H <sub>29</sub> O <sub>10</sub>                  | 405.17662    | 1.652 |          | formate adduct                           |
| 256.15597 | 8.63  | C <sub>13</sub> H <sub>23</sub> NO <sub>4</sub>                  | 256.15543    | 2.092 |          |                                          |
| 361.18767 | 8.70  | C <sub>17</sub> H <sub>30</sub> O <sub>8</sub>                   | 361.18680    | 2.444 |          |                                          |
| 199.09793 | 8.88  | C <sub>10</sub> H <sub>16</sub> O <sub>4</sub>                   | 199.09758    | 1.747 |          | likely dicarboxylate, Na adduct in ES(-) |
| 716.30686 | 9.12  | C <sub>33</sub> H <sub>52</sub> NO <sub>14</sub> P (?)           | 716.30527    | 2.226 |          | endo                                     |
| 270.17162 | 9.13  | C <sub>14</sub> H <sub>25</sub> NO <sub>5</sub>                  | 270.17108    | 1.999 |          |                                          |
| 758.35478 | 9.42  | C <sub>36</sub> H <sub>57</sub> NO <sub>14</sub> P (?)           | 758.35222    | 3.383 |          | endo                                     |
| 756.33820 | 9.44  | C <sub>36</sub> H <sub>55</sub> NO <sub>14</sub> P               | 756.33657    | 2.165 |          | endo                                     |
| 560.22734 | 9.58  | C <sub>25</sub> H <sub>40</sub> NO <sub>11</sub> P               | 560.22662    | 1.285 |          | endo                                     |
| 199.13434 | 9.77  | C <sub>11</sub> H <sub>20</sub> O <sub>3</sub>                   | 199.13397    | 1.850 | becyp#2  | characterized by 2D-NMR                  |
| 213.11365 | 9.79  | C <sub>11</sub> H <sub>18</sub> O <sub>4</sub>                   | 213.11323    | 1.970 | becyp#4  | likely dicarboxylate, Na adduct in ES(-) |
| 560.19103 | 9.89  | C <sub>24</sub> H <sub>36</sub> NO <sub>12</sub> P               | 560.19024    | 1.420 |          | MOGL                                     |
| 197.11851 | 9.90  | C <sub>11</sub> H <sub>18</sub> O <sub>3</sub>                   | 197.11832    | 0.988 |          | endo                                     |
| 558.17604 | 9.93  | C <sub>24</sub> H <sub>34</sub> NO <sub>12</sub> P               | 558.17459    | 2.603 |          |                                          |
| 542.23839 | 9.96  | C <sub>22</sub> H <sub>42</sub> NO <sub>12</sub> P               | 542.23719    | 1.864 |          | GLEA                                     |
| 199.13420 | 10.02 | C <sub>11</sub> H <sub>20</sub> O <sub>3</sub>                   | 199.13397    | 1.183 | becyp#22 | endo, minor                              |
| 639.27995 | 10.36 | C <sub>28</sub> H <sub>48</sub> O <sub>14</sub> P                | 639.27871    | 1.928 |          | endo                                     |
| 411.14319 | 10.47 | C <sub>16</sub> H <sub>28</sub> O <sub>10</sub> P                | 411.14255786 | 1.533 |          | endo                                     |
| 560.19090 | 10.57 | C <sub>24</sub> H <sub>36</sub> NO <sub>12</sub> P               | 560.19024    | 1.179 |          | endo, MOGL, anthranilate                 |
| 558.17534 | 10.66 | C <sub>24</sub> H <sub>34</sub> NO <sub>12</sub> P               | 558.17459    | 1.345 |          | endo                                     |
| 584.19113 | 10.68 | C <sub>26</sub> H <sub>35</sub> NO <sub>12</sub> P               | 584.19023    | 1.537 |          | endo                                     |
| 540.20149 | 10.74 | C <sub>25</sub> H <sub>36</sub> NO <sub>10</sub> P               | 540.20041    | 2.009 | iglu#202 | MOGL                                     |
| 411.14318 | 10.80 | C <sub>16</sub> H <sub>28</sub> O <sub>10</sub> P                | 411.14256    | 1.512 |          | endo                                     |
| 377.18250 | 11.16 | C <sub>17</sub> H <sub>30</sub> O <sub>9</sub>                   | 377.18171    | 2.100 |          | formate adduct                           |
| 544.19667 | 12.58 | C <sub>24</sub> H <sub>36</sub> NO <sub>11</sub> P (?)           | 544.19532    | 2.468 |          |                                          |
| 335.17716 | 17.31 | C <sub>21</sub> H <sub>24</sub> N <sub>2</sub> O <sub>2</sub>    | 335.17650    | 1.950 |          |                                          |
| 183.13906 | 9.95  | C <sub>11</sub> H <sub>20</sub> O <sub>2</sub>                   | 183.13905    | 0.037 | becyp#1  | post-column ion pairing                  |

**Supplementary Table 2. FCMT-1-derived metabolites.** A comprehensive list of FCMT-1-derived metabolites that were detected in the conditioned media (*exo-*) or worm body (*endo-*) metabolome of N2 (WT) synchronized gravid adults in liquid culture, unless otherwise indicated.

| ES(-) Obs. m/z | RT (min) | Molecular Formula                                                | ES(-) Theor. m/z | m/z error (ppm) | SMID-DB #  | Comments                                                                            |
|----------------|----------|------------------------------------------------------------------|------------------|-----------------|------------|-------------------------------------------------------------------------------------|
| 231.12393      | 7.18     | C <sub>11</sub> H <sub>20</sub> O <sub>5</sub>                   | 213.12380        | 0.584           | bemeth#401 | enriched <i>endo</i> , H/D exchange D <sub>8</sub> /D <sub>9</sub> /D <sub>10</sub> |
| 215.12902      | 8.33     | C <sub>11</sub> H <sub>20</sub> O <sub>4</sub>                   | 215.12888        | 0.725           | bemeth#33  | minor, D <sub>11</sub>                                                              |
| 215.12902      | 8.40     | C <sub>11</sub> H <sub>20</sub> O <sub>4</sub>                   | 215.12888        | 0.725           | bemeth#34  | minor, D <sub>11</sub>                                                              |
| 215.12900      | 8.51     | C <sub>11</sub> H <sub>20</sub> O <sub>4</sub>                   | 215.12888        | 0.545           | bemeth#35  | minor, D <sub>11</sub>                                                              |
| 286.16622      | 8.57     | C <sub>14</sub> H <sub>25</sub> NO <sub>5</sub>                  | 286.16600        | 0.785           | bemeth#73  | D <sub>11</sub>                                                                     |
| 213.11345      | 8.58     | C <sub>11</sub> H <sub>18</sub> O <sub>4</sub>                   | 213.11323        | 1.014           | bemeth#322 | enriched <i>endo</i> , H/D exchange D <sub>5</sub> /D <sub>6</sub> /D <sub>7</sub>  |
| 215.12904      | 8.61     | C <sub>11</sub> H <sub>20</sub> O <sub>4</sub>                   | 215.12888        | 0.731           | bemeth#3   | major, D <sub>11</sub><br>presumed 2R,3S                                            |
| 229.10833      | 8.65     | C <sub>11</sub> H <sub>18</sub> O <sub>5</sub>                   | 229.10815        | 0.778           | bemeth#4   | enriched <i>hacl</i> -1, D <sub>9</sub>                                             |
| 286.16620      | 8.69     | C <sub>14</sub> H <sub>25</sub> NO <sub>5</sub>                  | 286.16600        | 0.711           | bemeth#74  | D <sub>11</sub>                                                                     |
| 286.16618      | 8.76     | C <sub>14</sub> H <sub>25</sub> NO <sub>5</sub>                  | 286.16600        | 0.641           | bemeth#75  | D <sub>11</sub>                                                                     |
| 215.12901      | 8.78     | C <sub>11</sub> H <sub>20</sub> O <sub>4</sub>                   | 215.12888        | 0.616           | bemeth#32  | secondary, D <sub>11</sub>                                                          |
| 546.21123      | 8.80     | C <sub>24</sub> H <sub>38</sub> NO <sub>11</sub> P               | 546.21097        | 0.478           | TBD        | detected only in N <sub>2</sub> , D <sub>12</sub>                                   |
| 231.12395      | 8.93     | C <sub>11</sub> H <sub>20</sub> O <sub>5</sub>                   | 213.12380        | 0.684           | bemeth#402 | detected only in <i>hacl</i> -1( <i>tm6725</i> )                                    |
| 215.12894      | 9.01     | C <sub>11</sub> H <sub>20</sub> O <sub>4</sub>                   | 215.12888        | 0.266           | bemeth#37  | minor, D <sub>11</sub>                                                              |
| 361.18722      | 9.08     | C <sub>17</sub> H <sub>30</sub> O <sub>8</sub>                   | 361.18679        | 1.194           | bemeth#8   | putative glucoside                                                                  |
| 591.17185      | 9.13     | C <sub>22</sub> H <sub>33</sub> N <sub>4</sub> O <sub>13</sub> P | 591.17090        | 1.615           | gluric#421 | MOGL, enriched <i>endo</i> , co-eluting cyclopropyl isomer, D <sub>11</sub>         |
| 215.12885      | 9.14     | C <sub>11</sub> H <sub>20</sub> O <sub>4</sub>                   | 215.12888        | 0.152           | bemeth#38  | minor, D <sub>11</sub>                                                              |
| 576.22211      | 9.21     | C <sub>25</sub> H <sub>39</sub> NO <sub>12</sub> P               | 576.22154        | 1.003           | oglu#421   | MOGL, <i>endo</i>                                                                   |
| 591.17178      | 9.26     | C <sub>22</sub> H <sub>33</sub> N <sub>4</sub> O <sub>13</sub> P | 591.17090        | 1.506           | gluric#422 | MOGL, enriched <i>endo</i> , D <sub>11</sub>                                        |
| 607.16641      | 9.28     | C <sub>22</sub> H <sub>33</sub> N <sub>4</sub> O <sub>14</sub> P | 607.16581        | 0.984           | gluric#431 | MOGL, enriched <i>endo</i>                                                          |
| 268.15553      | 9.28     | C <sub>14</sub> H <sub>23</sub> NO <sub>4</sub>                  | 268.15543        | 0.369           | bemeth#622 |                                                                                     |
| 441.15345      | 9.29     | C <sub>17</sub> H <sub>31</sub> O <sub>11</sub> P                | 441.15312        | 0.747           | bemeth#82  | putative phosphorylated glucoside, <i>endo</i>                                      |
| 558.21201      | 9.64     | C <sub>25</sub> H <sub>38</sub> NO <sub>11</sub> P               | 558.21097        | 1.854           | TBD        | D <sub>12</sub>                                                                     |
| 213.11343      | 10.06    | C <sub>11</sub> H <sub>18</sub> O <sub>4</sub>                   | 213.11323        | 0.529           | bemeth#321 | H/D exchange D <sub>8</sub> /D <sub>9</sub>                                         |
| 199.13413      | 10.26    | C <sub>11</sub> H <sub>20</sub> O <sub>3</sub>                   | 199.13397        | 0.811           | bemeth#25  | co-eluting isomer, clearly differential in <i>endo</i> , D <sub>11</sub>            |
| 215.12900      | 10.46    | C <sub>11</sub> H <sub>20</sub> O <sub>4</sub>                   | 215.12888        | 0.559           | bemeth#39  | minor                                                                               |
| 201.14983      | 10.71    | C <sub>11</sub> H <sub>22</sub> O <sub>3</sub>                   | 201.14962        | 1.050           | bemeth#203 | minor                                                                               |
| 591.17166      | 10.96    | C <sub>22</sub> H <sub>33</sub> N <sub>4</sub> O <sub>13</sub> P | 591.17090        | 1.297           | gluric#423 | MOGL, enriched <i>endo</i> , D <sub>12</sub>                                        |
| 607.16623      | 10.98    | C <sub>22</sub> H <sub>33</sub> N <sub>4</sub> O <sub>14</sub> P | 607.16581        | 0.690           | gluric#432 | MOGL, enriched <i>endo</i>                                                          |
| 256.15555      | 11.36    | C <sub>13</sub> H <sub>23</sub> NO <sub>4</sub>                  | 256.15543        | 0.472           | bemeth#53  | minor                                                                               |
| 286.16616      | 11.37    | C <sub>14</sub> H <sub>25</sub> NO <sub>5</sub>                  | 286.16600        | 0.574           | bemeth#7   | major, D <sub>12</sub>                                                              |
| 256.15555      | 11.42    | C <sub>13</sub> H <sub>23</sub> NO <sub>4</sub>                  | 256.15543        | 0.472           | bemeth#54  | minor, D <sub>12</sub>                                                              |

|                              |                 |                                                    |                                |                               |                  |                                                                |
|------------------------------|-----------------|----------------------------------------------------|--------------------------------|-------------------------------|------------------|----------------------------------------------------------------|
| 286.16624                    | 11.57           | C <sub>14</sub> H <sub>25</sub> NO <sub>5</sub>    | 286.16600                      | 0.873                         | bemeth#72        | secondary, D <sub>12</sub>                                     |
| 256.15535                    | 11.76           | C <sub>13</sub> H <sub>23</sub> NO <sub>4</sub>    | 256.15543                      | 0.301                         | bemeth#5         | major, D <sub>12</sub>                                         |
| 256.15558                    | 11.93           | C <sub>13</sub> H <sub>23</sub> NO <sub>4</sub>    | 256.15543                      | 0.571                         | bemeth#52        | minor                                                          |
| 284.15051                    | 11.95           | C <sub>14</sub> H <sub>23</sub> NO <sub>5</sub>    | 284.15035                      | 0.568                         | bemeth#721       | minor                                                          |
| 268.15553                    | 12.19           | C <sub>14</sub> H <sub>23</sub> NO <sub>4</sub>    | 268.15543                      | 0.365                         | bemeth#621       | minor                                                          |
| 270.17116                    | 12.46           | C <sub>14</sub> H <sub>25</sub> NO <sub>4</sub>    | 270.17108                      | 0.275                         | bemeth#6         | major, D <sub>12</sub>                                         |
| 199.13412                    | 12.59           | C <sub>11</sub> H <sub>20</sub> O <sub>3</sub>     | 199.13397                      | 0.794                         | bemeth#23        | unknown structure, D <sub>12</sub> ,                           |
| 201.14976                    | 12.62           | C <sub>11</sub> H <sub>22</sub> O <sub>3</sub>     | 201.14962                      | 0.718                         | bemeth#202       | minor                                                          |
| 270.17118                    | 12.65           | C <sub>14</sub> H <sub>25</sub> NO <sub>4</sub>    | 270.17108                      | 0.350                         | bemeth#62        | secondary, D <sub>12</sub>                                     |
| 199.13408                    | 12.67           | C <sub>11</sub> H <sub>20</sub> O <sub>3</sub>     | 199.13397                      | 0.580                         | bemeth#22        | 2 <i>S</i> ,3 <i>S</i> ( <i>anti</i> ), minor, D <sub>12</sub> |
| 199.13408                    | 12.83           | C <sub>11</sub> H <sub>20</sub> O <sub>3</sub>     | 199.13397                      | 0.580                         | bemeth#2         | 2 <i>R</i> ,3 <i>S</i> ( <i>syn</i> ), major, D <sub>12</sub>  |
| 197.11838                    | 12.89           | C <sub>11</sub> H <sub>18</sub> O <sub>3</sub>     | 197.11832                      | 0.300                         | bemeth#221       |                                                                |
| 540.20039                    | 13.18           | C <sub>25</sub> H <sub>36</sub> NO <sub>10</sub> P | 540.20041                      | 0.033                         | iglu#201         | MOGL, enriched <i>exo</i> , D <sub>12</sub>                    |
| 252.16065                    | 13.20           | C <sub>14</sub> H <sub>23</sub> NO <sub>3</sub>    | 252.16052                      | 0.523                         | bemeth#521       |                                                                |
| 201.14977                    | 13.52           | C <sub>11</sub> H <sub>22</sub> O <sub>3</sub>     | 201.14962                      | 0.762                         | bemeth#201       |                                                                |
| 199.13413                    | 14.37           | C <sub>11</sub> H <sub>20</sub> O <sub>3</sub>     | 199.13397                      | 0.807                         | bemeth#24        | unknown structure                                              |
| 183.13928                    | 26.65           | C <sub>11</sub> H <sub>20</sub> O <sub>2</sub>     | 183.13905                      | 1.239                         | bemeth#1         | Long HPLC method, post-column ion pairing                      |
| <b>ES(+) Obs. <i>m/z</i></b> | <b>RT (min)</b> | <b>Molecular Formula</b>                           | <b>ES(+) Theor. <i>m/z</i></b> | <b><i>m/z</i> error (ppm)</b> | <b>SMID-DB #</b> | <b>Comments</b>                                                |
| 260.18523                    | 8.90            | C <sub>13</sub> H <sub>25</sub> NO <sub>4</sub>    | 260.18564                      | 1.576                         | bemeth#101       |                                                                |
| 244.19040                    | 11.56           | C <sub>13</sub> H <sub>25</sub> NO <sub>3</sub>    | 244.19072                      | 1.330                         | bemeth#102       |                                                                |
| 246.20612                    | 12.12           | C <sub>13</sub> H <sub>27</sub> NO <sub>3</sub>    | 246.20637                      | 1.022                         | bemeth#103       | enriched in <i>hacl-1(tm6725)</i>                              |
| 246.20606                    | 12.36           | C <sub>13</sub> H <sub>27</sub> NO <sub>3</sub>    | 246.20637                      | 1.272                         | bemeth#104       | detected only in <i>hacl-1(tm6725)</i>                         |
| 230.21103                    | 12.98           | C <sub>13</sub> H <sub>27</sub> NO <sub>2</sub>    | 230.21146                      | 1.689                         | bemeth#105       |                                                                |

**Supplementary Table 3.** Primers used for genotyping.

| Strain                           | Primer Sequence                   |
|----------------------------------|-----------------------------------|
| FCS7 <i>hacl-1(tm6725)</i> II    | Fwd: GAAGTAGGAATGGCAGCACAAG       |
|                                  | Rev: GGCCTGCTGAACTTGTGTAGCTC      |
|                                  | Int. Fwd: CTGCTGGCCTGTAGTCTGTATTG |
| FCS40 <i>fcmt-1(gk155709)</i> II | Fwd: CCGAGCACTCTGGGAGATTG         |
|                                  | Rev: GTGCTACCAAATCCCACCG          |
| FCS20 <i>fcmt-1(tm2382)</i> II   | Fwd: CATCCAGGCGCTGGAATTC          |
|                                  | Rev: GCTCAATCGAAACCCGTGC          |



**Supplementary Table 4.** Primers used for gene expression analysis by RT-PCR.

| Gene         | Primer Sequence               |
|--------------|-------------------------------|
| <i>act-1</i> | Fwd: ACGACGAGTCCGGCCCATCC     |
|              | Rev: GAAAGCTGGTGGTGACGATGGTT  |
| <i>fat-7</i> | Fwd: GGAAGGAGACAGCATTTCATTGCG |
|              | Rev: GTCTTGTGGGAATGTGTGGTGG   |
| <i>fat-6</i> | Fwd: GGAAATTGTGTGGCGTAACG     |
|              | Rev: GTATGATTTGTGGGACCAGAGACG |

**Supplementary Table 5.** <sup>1</sup>H NMR spectroscopic data of natural becyp#2, methanol-d<sub>4</sub> (800 MHz, CD<sub>3</sub>OD).

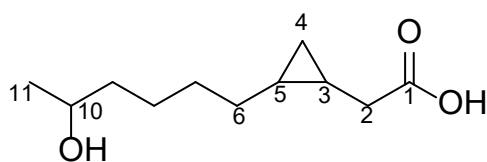

| Position | Proton                               | <sup>1</sup> H chemical shift [ppm] | [ <sup>1</sup> H, <sup>1</sup> H]-Coupling constants [Hz]                      |
|----------|--------------------------------------|-------------------------------------|--------------------------------------------------------------------------------|
| 1        |                                      |                                     |                                                                                |
| 2        | 2-H <sub>a</sub><br>2-H <sub>b</sub> | 2.16<br>2.28                        | $J_{2-H_a, 2-H_b} = 15.8$ , $J_{2-H_a, 2-3} = 7.8$ ,<br>$J_{2-H_b, 3} = 6.0$ , |
| 3        | 3-H                                  | 1.09                                |                                                                                |
| 4        | 4-H <sub>a</sub><br>4-H <sub>b</sub> | -0.15<br>0.68                       |                                                                                |
| 5        | 5-H                                  | 0.78                                |                                                                                |
| 6-9      | 6-9H                                 | 1.3-1.5                             |                                                                                |
| 10       | 10-H                                 | 3.72                                | $J_{9,10} \approx J_{10,11} = 6.1$                                             |
| 11       | 11-H                                 | 1.14                                | $J_{10,11} = 6.1$                                                              |

## Supplementary References

1. Wilson, S.R., and Prodan, K.A. (1976). The synthesis and stereochemistry of cascarillic acid. *Tetrahedron Lett.* *17*, 4231–4234.
2. Naef, R., Velluz, A., and Jaquier, A. (2007). New Volatile Sulfur-Containing Constituents in a Simultaneous Distillation–Extraction Extract of Red Bell Peppers (*Capsicum annuum*). *J. Agric. Food Chem.* *56*, 517–527.
3. Gao, Y., Sharpless, K.B., Klunder, J.M., Hanson, R.M., Ko, S.Y., and Masamune, H. (1987). Catalytic Asymmetric Epoxidation and Kinetic Resolution: Modified Procedures Including in Situ Derivatization. *J. Am. Chem. Soc.* *109*, 5765–5780.
4. Francke, W., Schröder, F., Philipp, P., Meyer, H., Sinnwell, V., and Gries, G. (1996). Identification and synthesis of new bicyclic acetals from the mountain pine beetle, *Dendroctonus ponderosae hopkins* (Col.: Scol.). *Bioorg. Med. Chem.* *4*, 363–374.
5. Paquette, L.A., Eizember, R.F., Chapman, O.L., Rettig, T.A., Griswold, A.A., Dutton, A.I., Fitton, P., Abrahamson, W., F Littler, J.G., Vo, K., et al. (1963). Photochemistry of the cis- and trans-Bicyclo [6.1.0]nonan-2-ones<sup>1</sup> Wiberg and deMeijere have estimated that an enthalpy difference of 3.5 kcal/mole separates 1 from 2,4 (6) E. *Tetrahedron Lett* *21*, 59.
6. Fallis, A.G., and Souweha, M.S. (2008). Sigmatropic Rearrangements. Polyynes, Arynes, Enynes, and Alkynes *53*, 1.
7. Coggins, A.J., and Powner, M.W. (2016). Prebiotic synthesis of phosphoenol pyruvate by  $\alpha$ -phosphorylation-controlled triose glycolysis. *Nat. Chem.* 2016 *94* *9*, 310–317.
8. Davis, F.A., Haque, M.S., Ulatowski, T.G., and Towson, J.C. (1986). Asymmetric Oxidation of Ester and Amide Enolates Using New (Camphorylsulfonyl)oxaziridines. *J. Org. Chem.* *51*, 2402–2404.
9. Hoye, T.R., Jeffrey, C.S., and Shao, F. (2007). Mosher ester analysis for the determination of absolute configuration of stereogenic (chiral) carbinol carbons. *Nat. Protoc.* 2007 *210* *2*, 2451–2458.

## NMR Spectra of Synthetic Compounds

*cis*-3,4-methylenedecanoic acid, becyp#1, <sup>1</sup>H NMR spectrum (500 MHz, CDCl<sub>3</sub>)

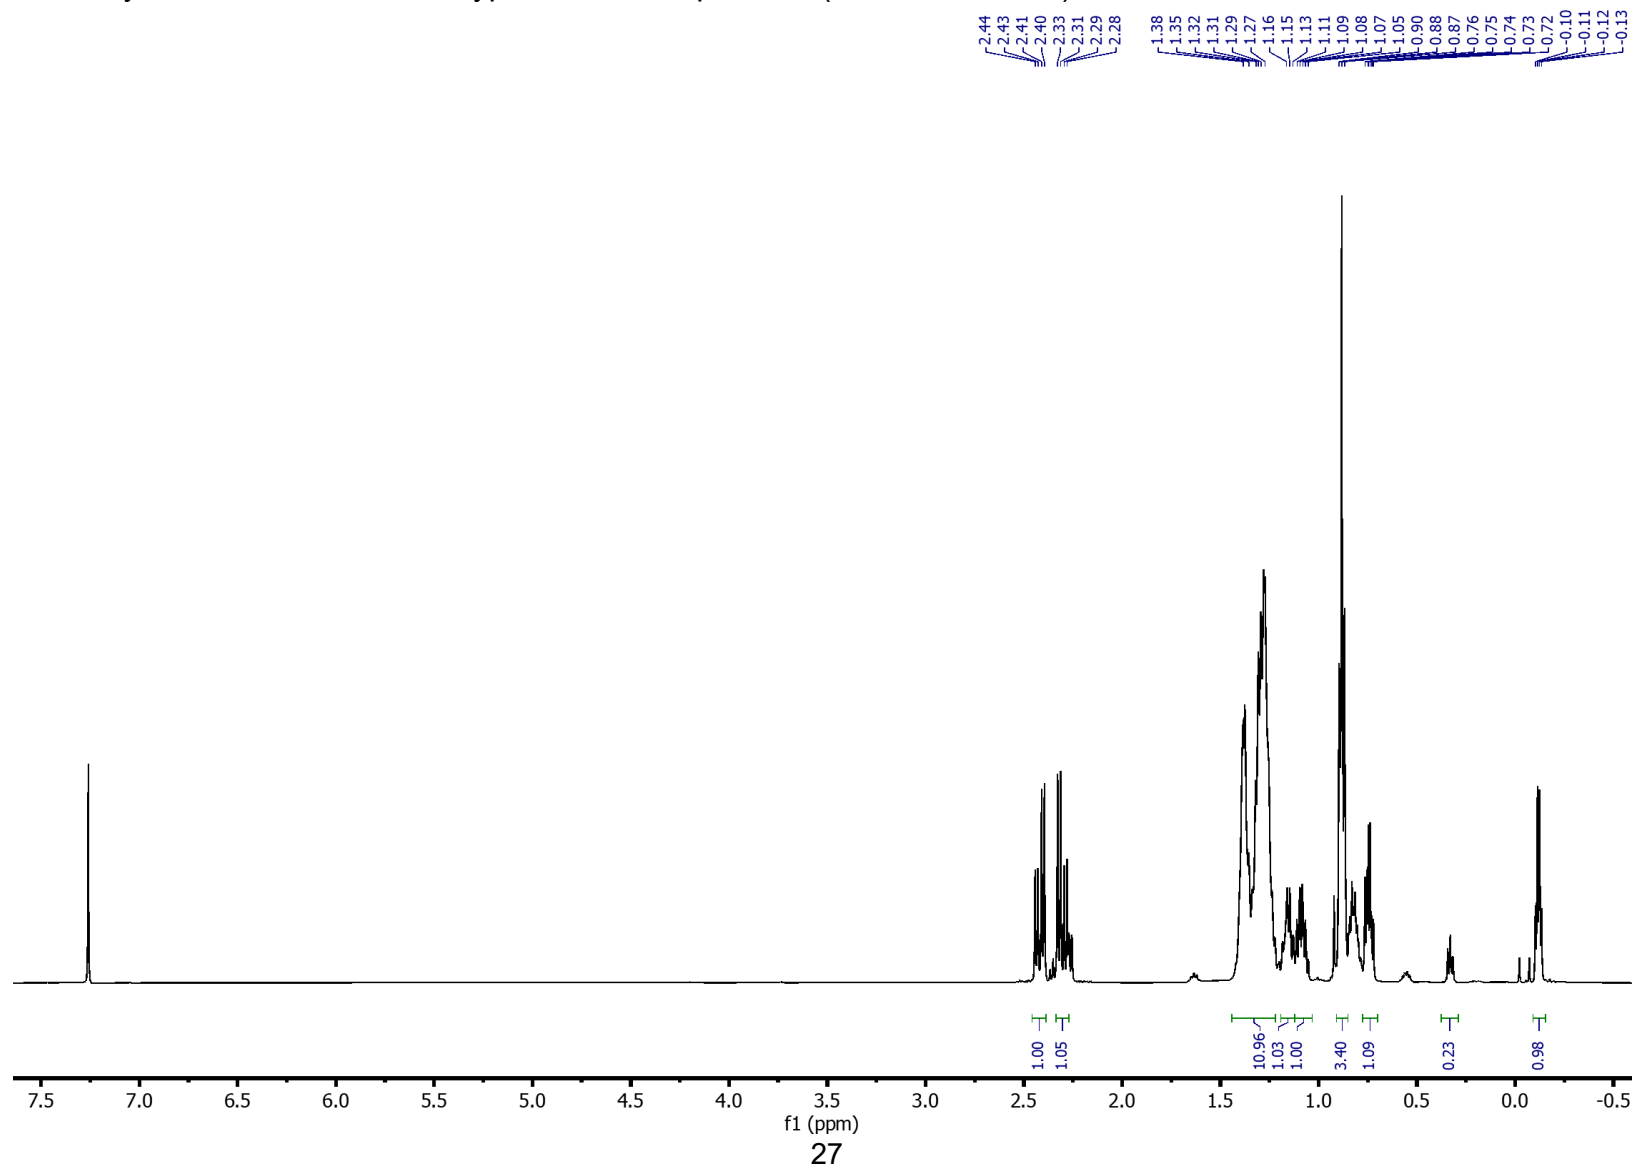

*cis*-3,4-methylenedecanoic acid, becyp#1,  $^{13}\text{C}$  NMR spectrum (125 MHz,  $\text{CDCl}_3$ )

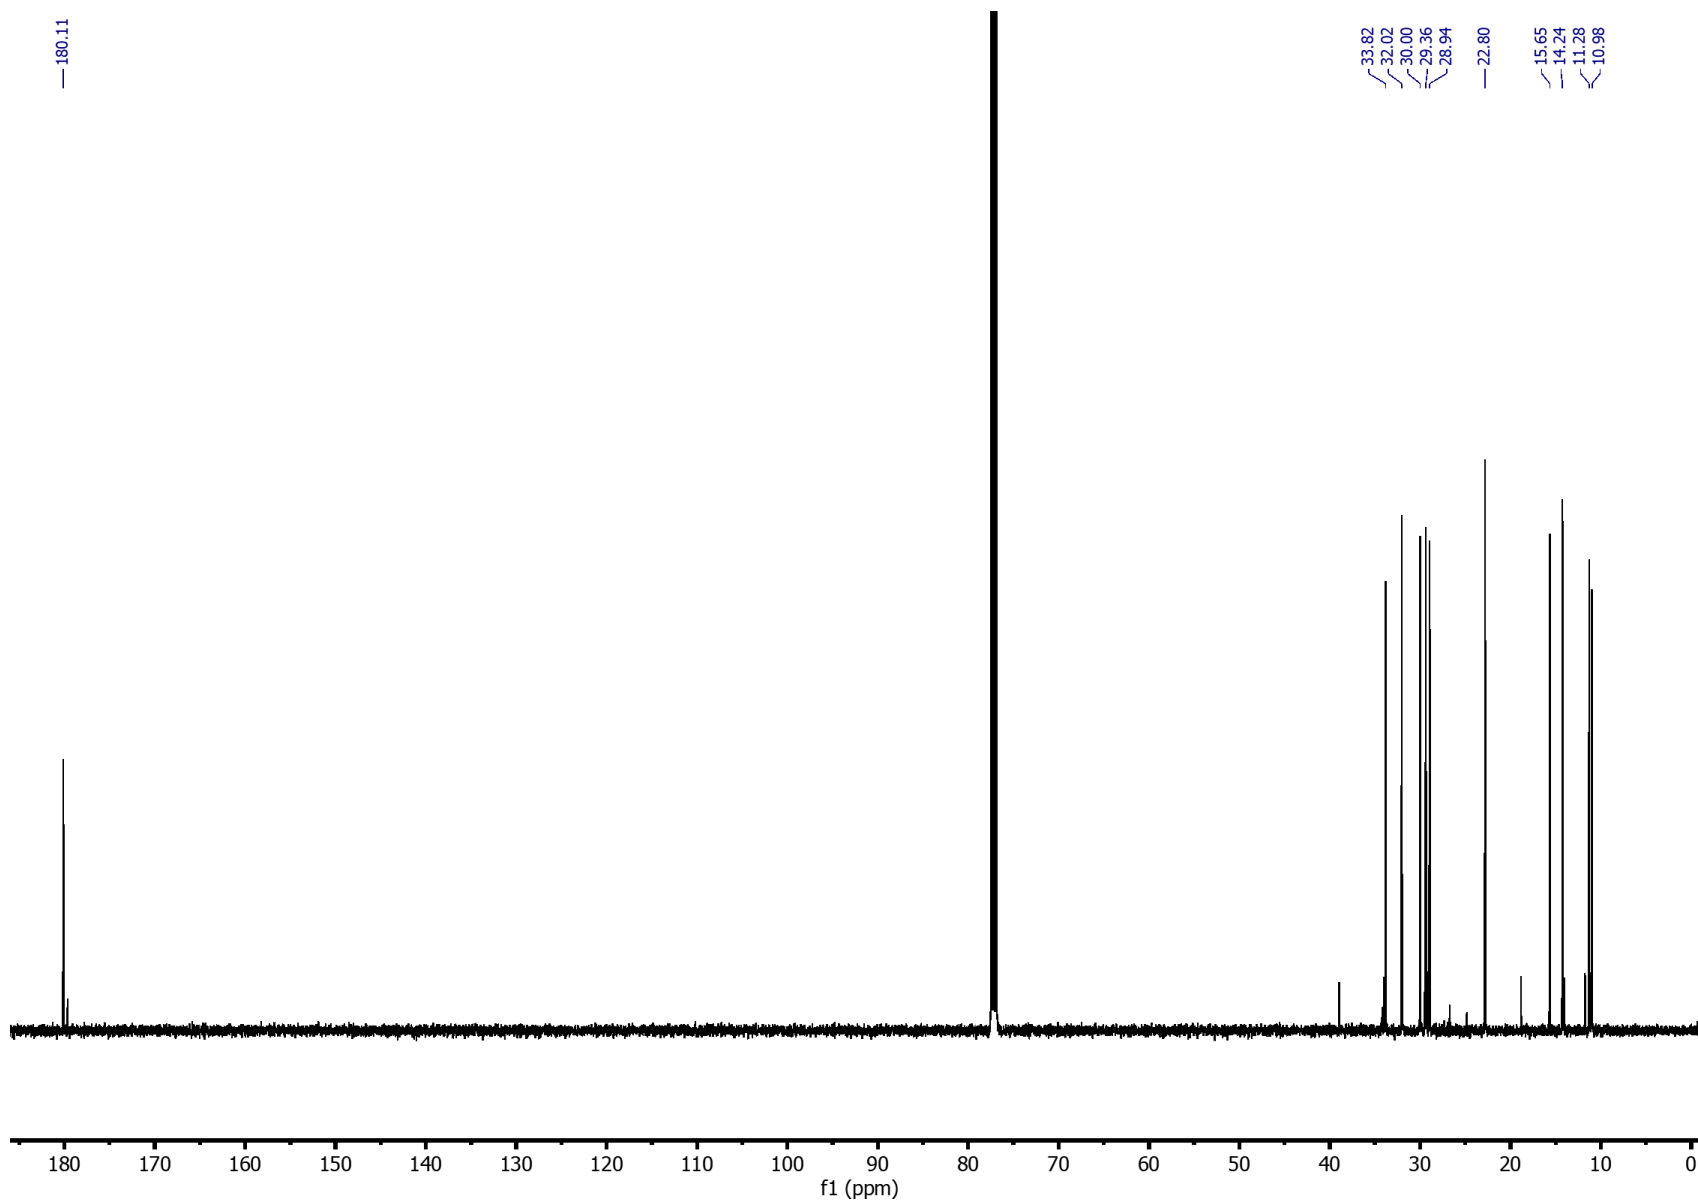

(E)-4-Hydroxy-non-2-ene (**5**), <sup>1</sup>H NMR spectrum (500 MHz, CDCl<sub>3</sub>)

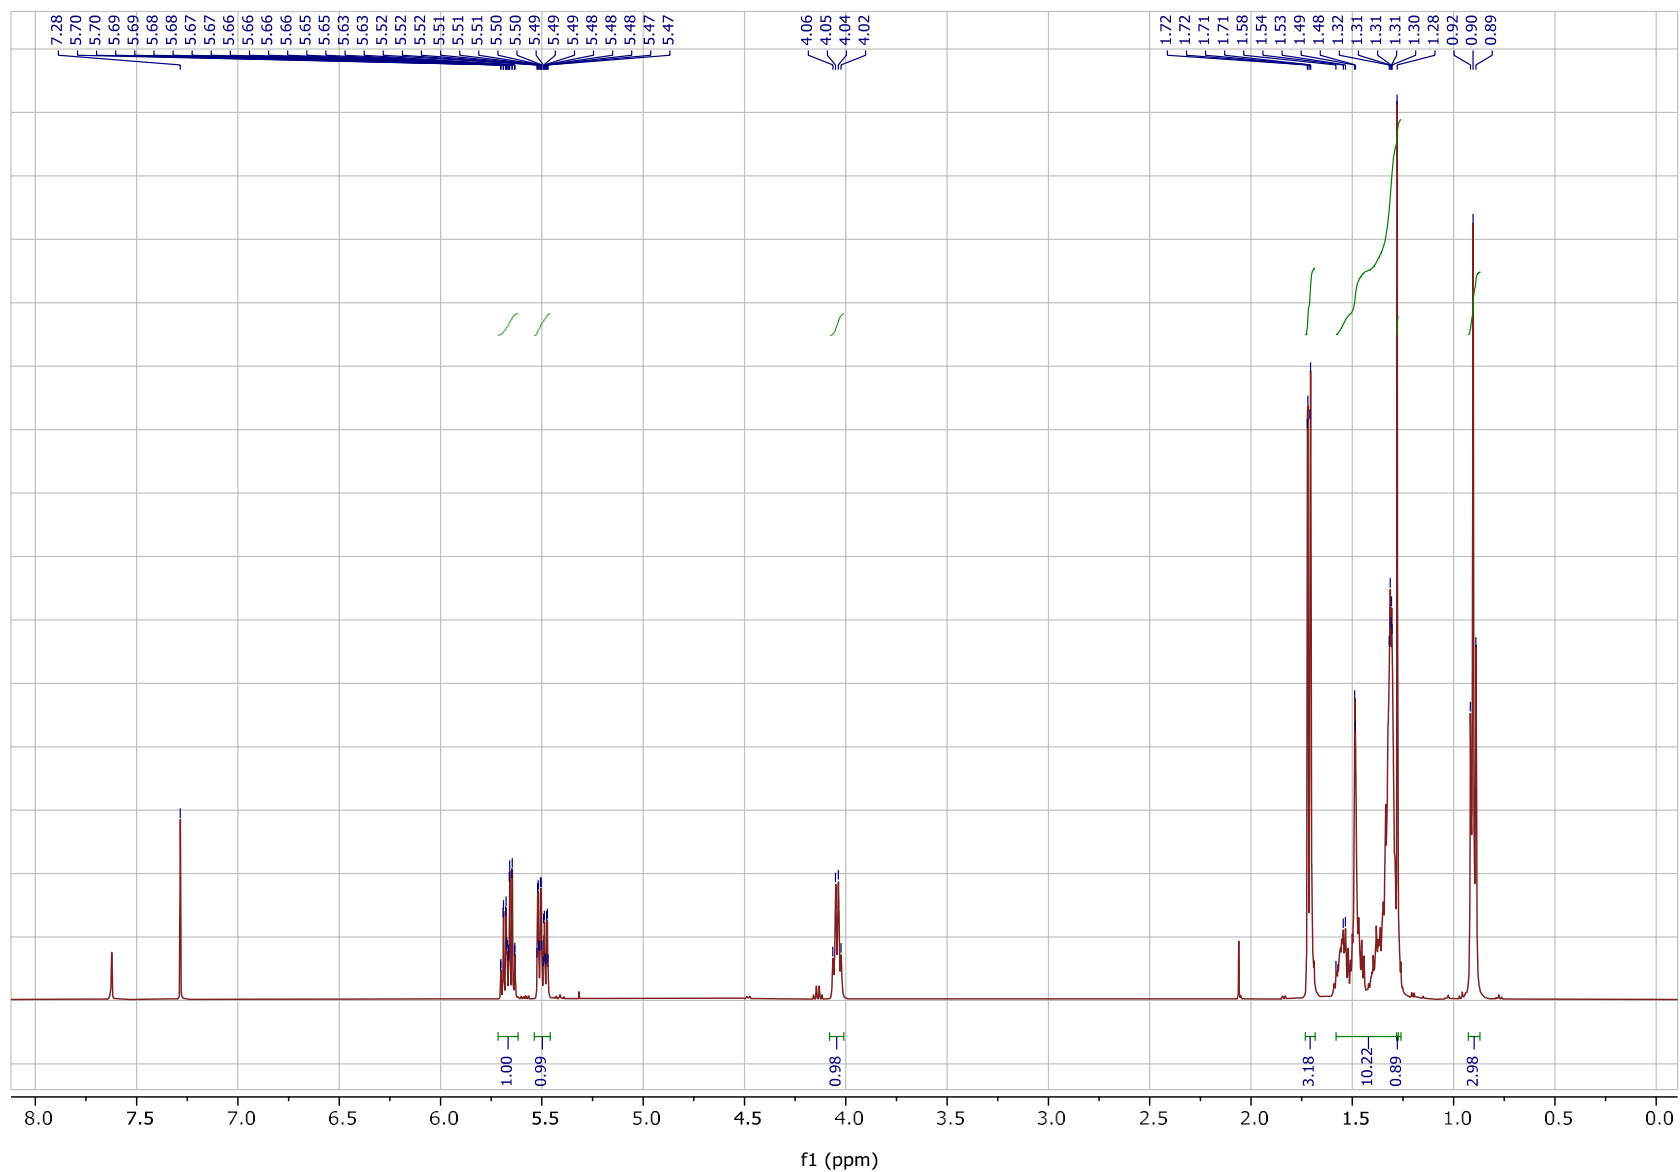

(*E*)-4-Hydroxy-non-2-ene (**5**),  $^{13}\text{C}$  NMR spectrum (125 MHz,  $\text{CDCl}_3$ )

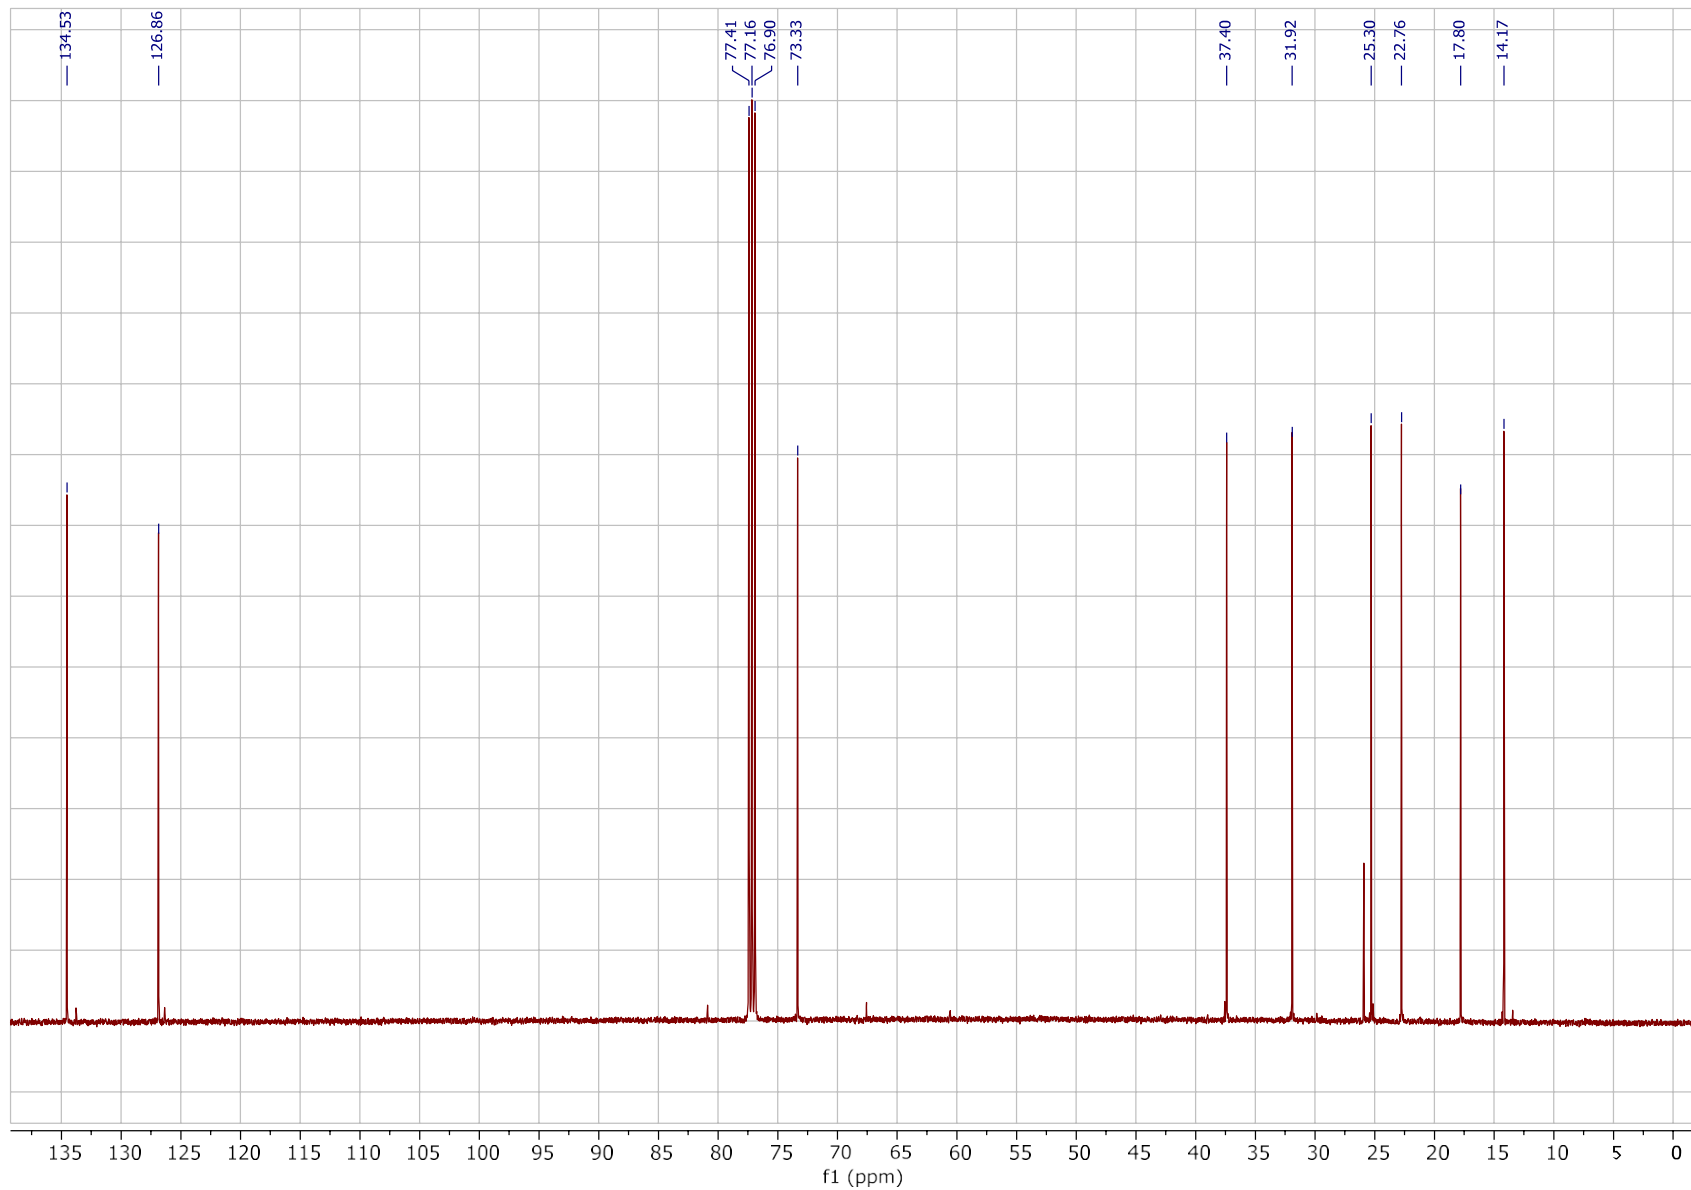

(*S,E*)-4-(Vinyloxy)-non-2-ene (**6**), <sup>1</sup>H NMR spectrum(500 MHz, CDCl<sub>3</sub>)

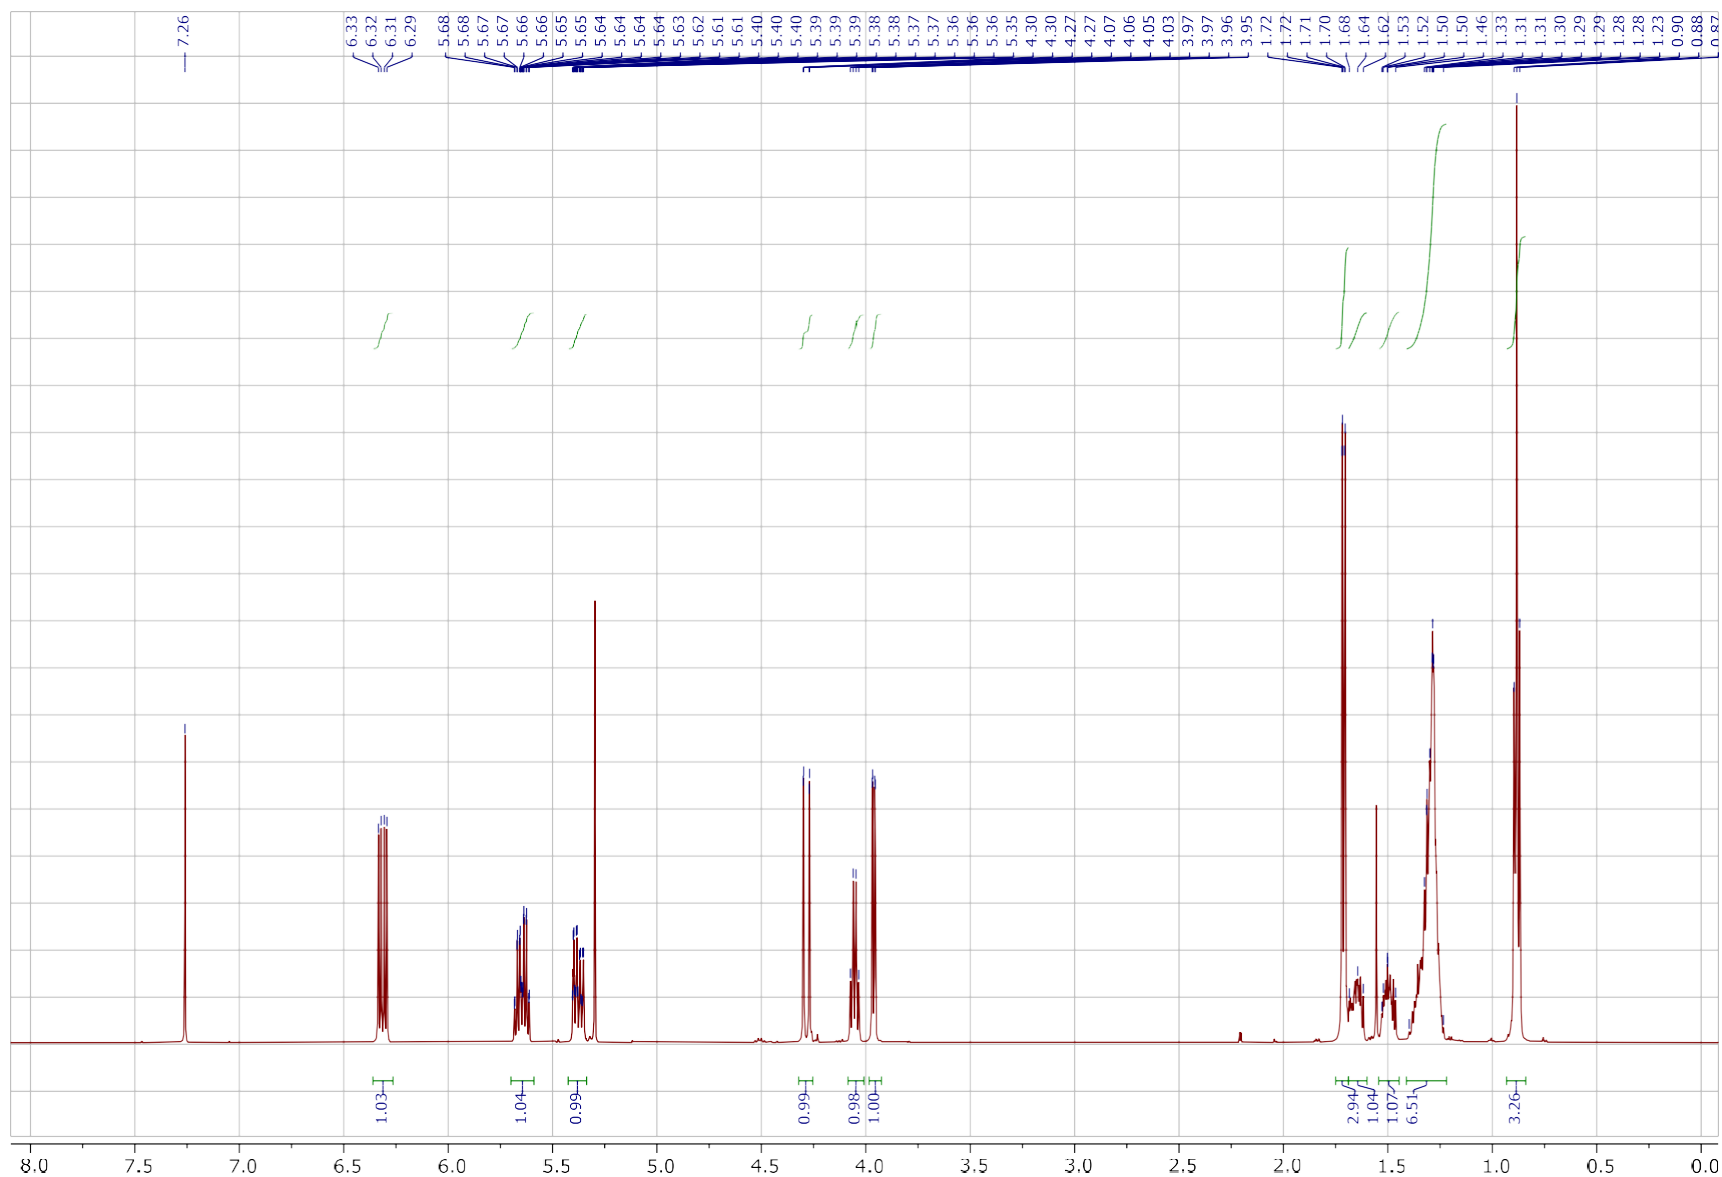

(*S,E*)-4-(Vinyloxy)-non-2-ene (**6**),  $^{13}\text{C}$  NMR spectrum (125 MHz,  $\text{CDCl}_3$ )

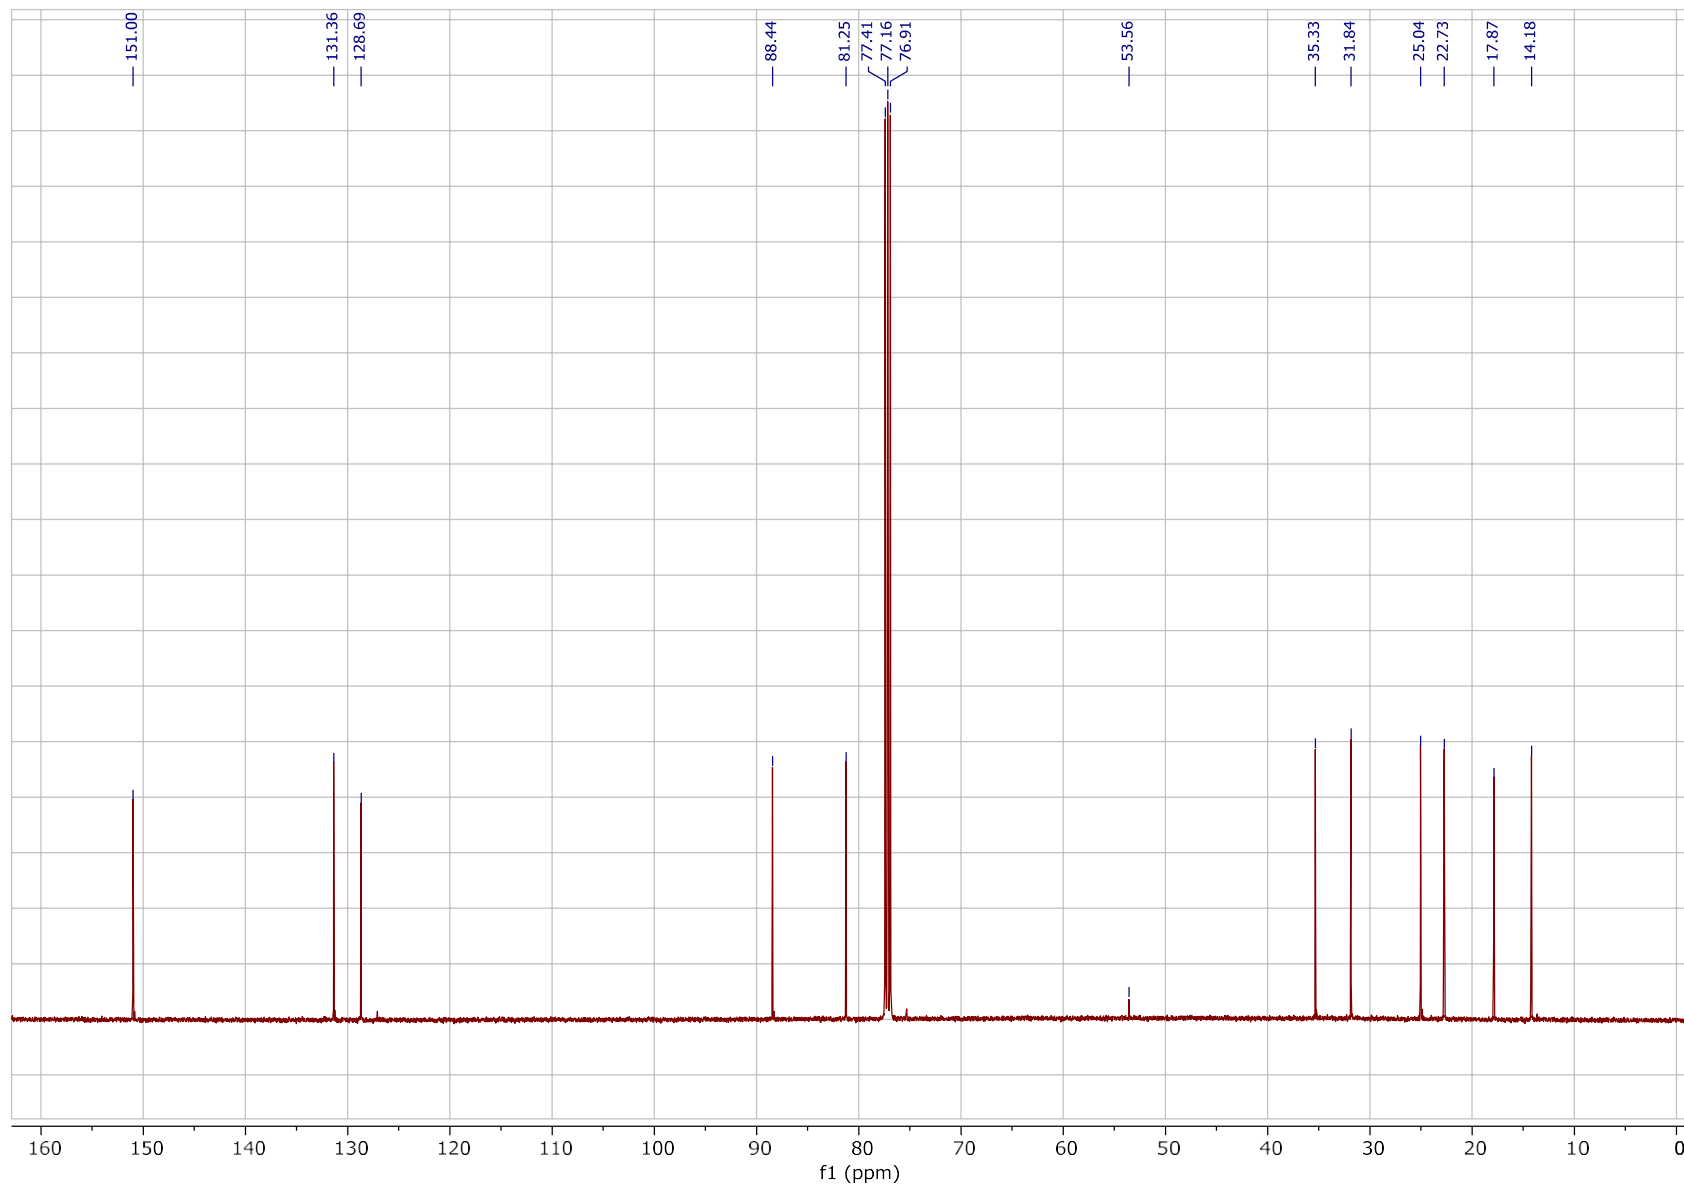



(*R,E*)-3-Methyl-dec-4-enal (**7**), <sup>1</sup>H NMR spectrum (500 MHz, CDCl<sub>3</sub>)

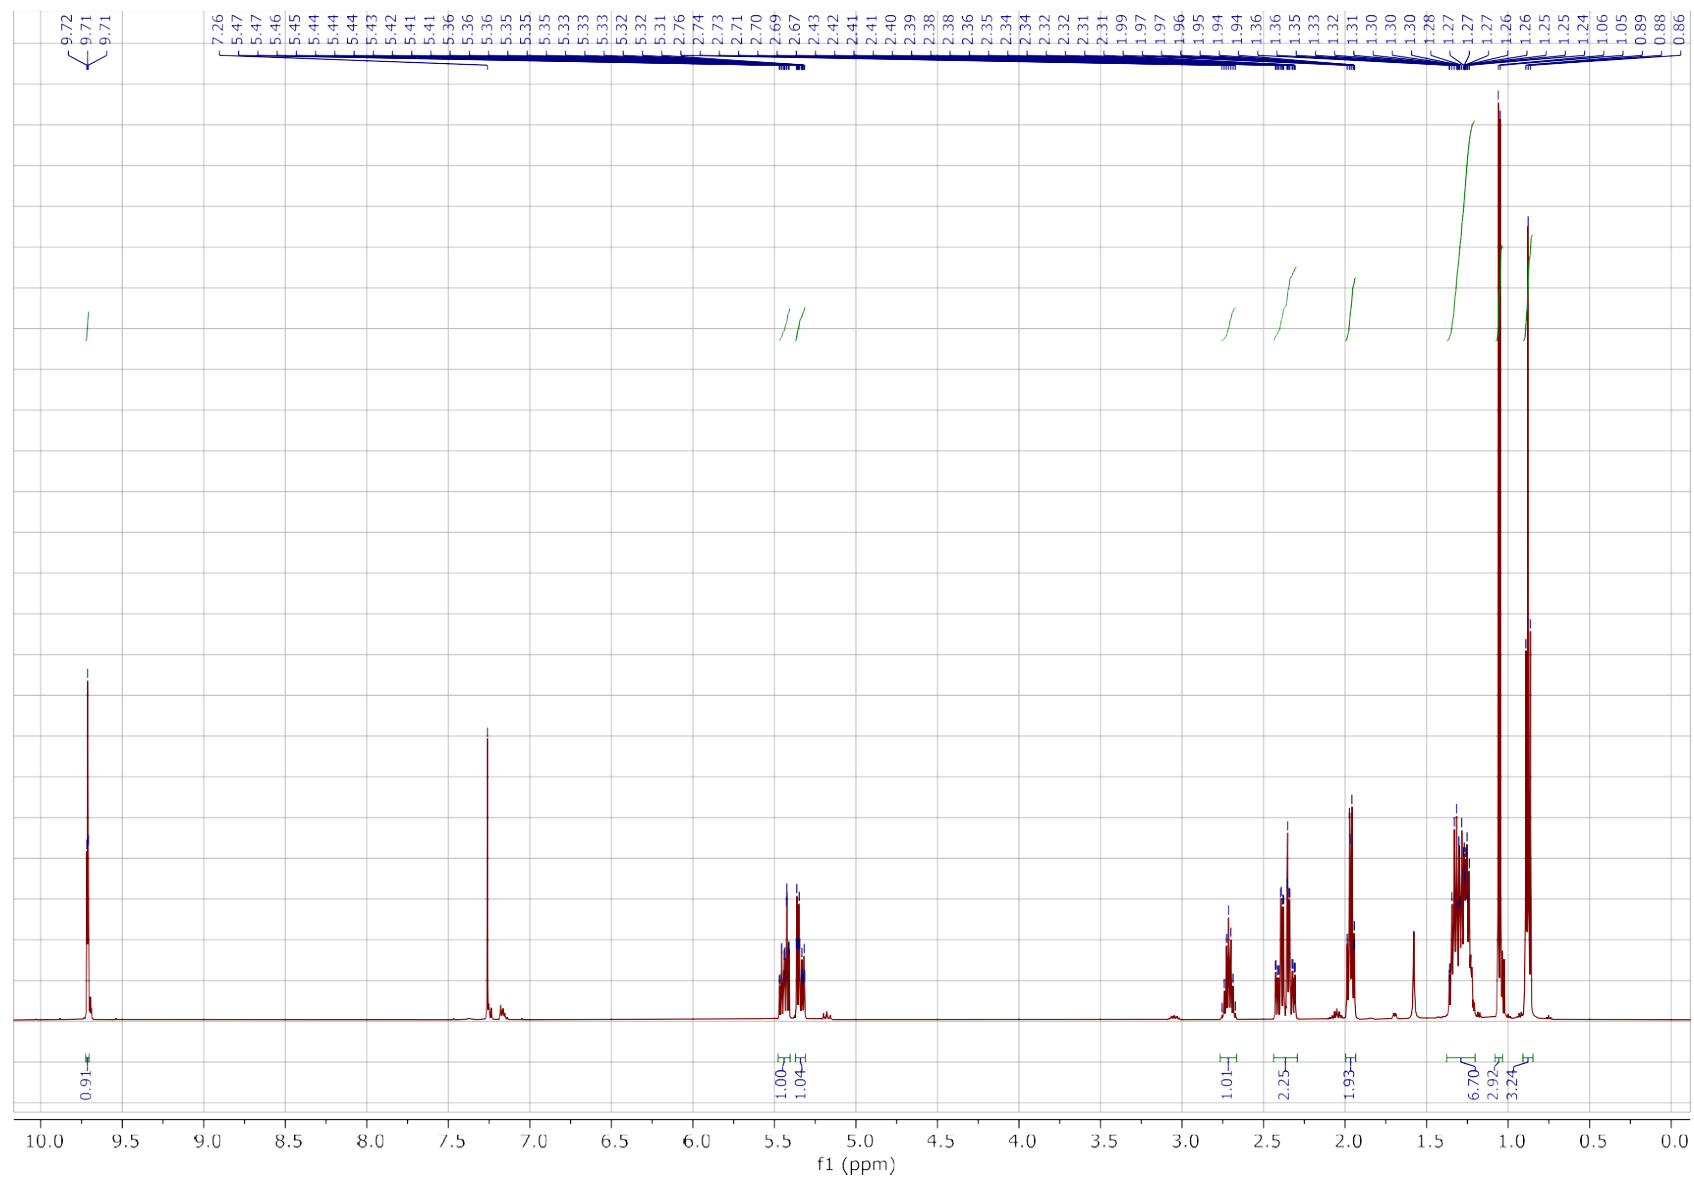

(*R,E*)-3-Methyl-dec-4-enal (**7**),  $^{13}\text{C}$  NMR spectrum (125 MHz,  $\text{CDCl}_3$ )

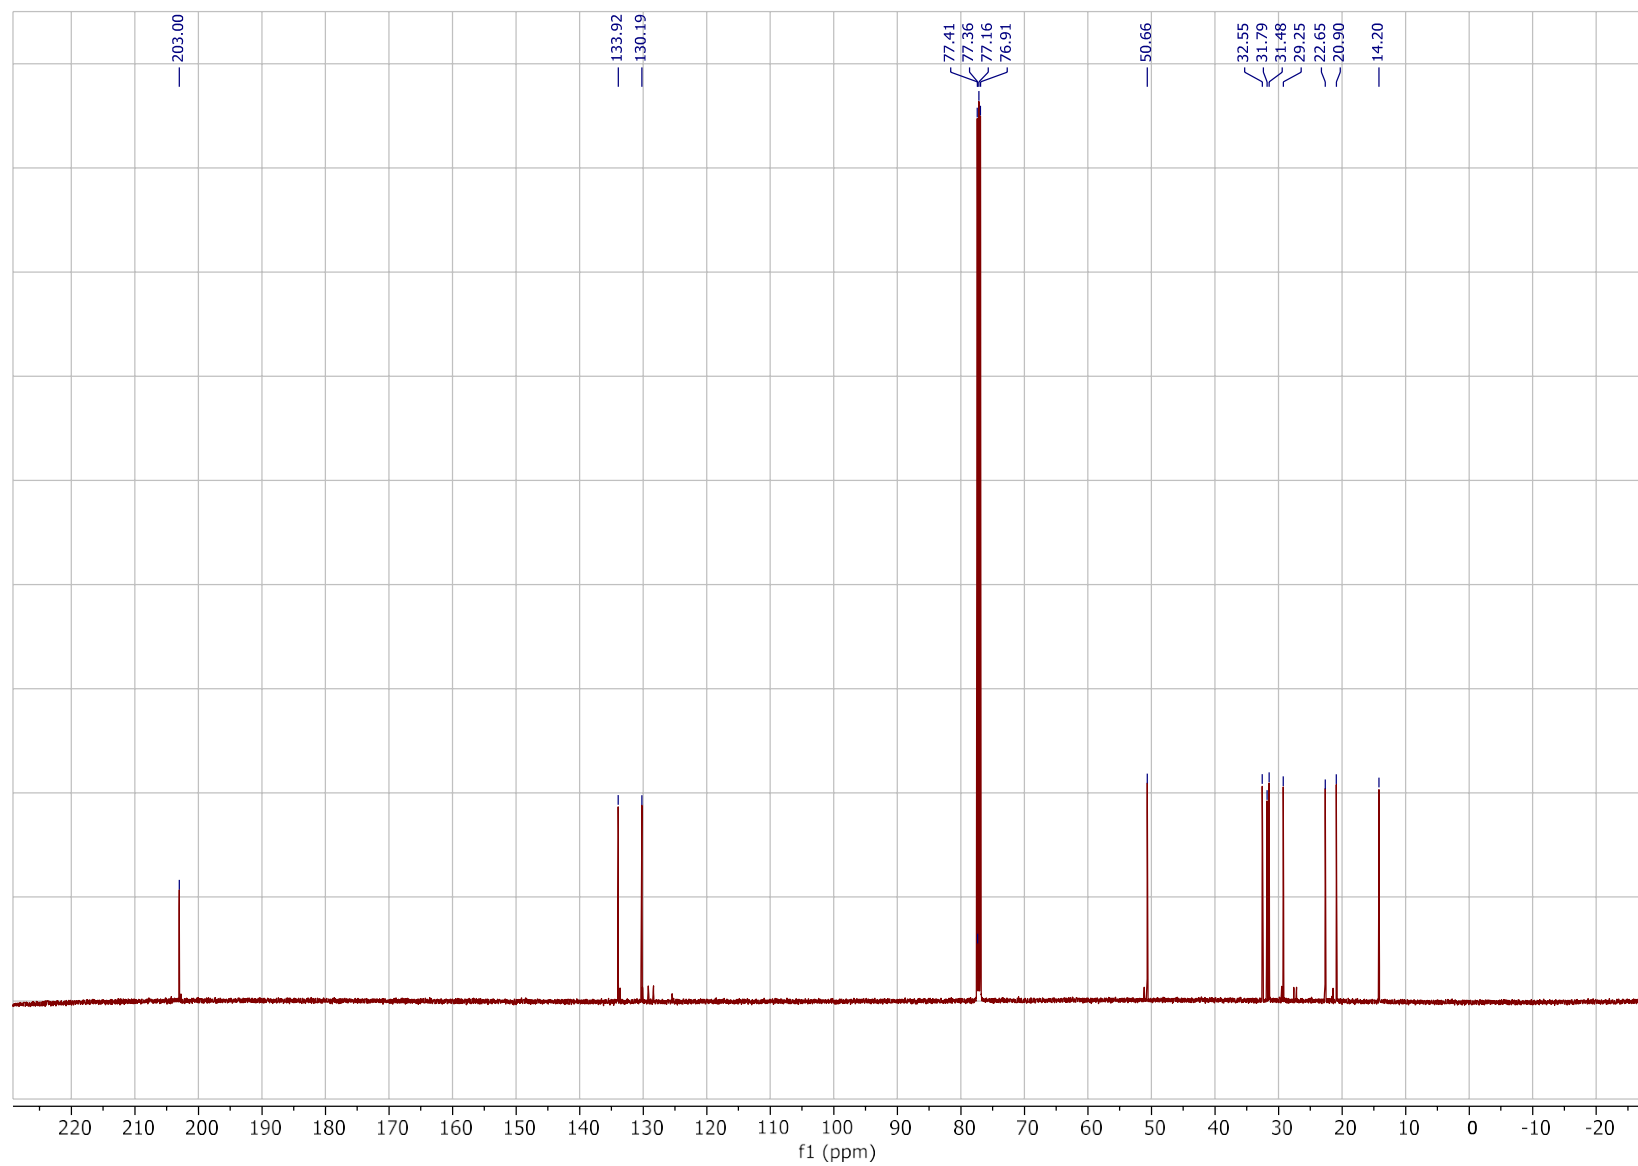

((R,E)-3-Methyl-dec-4-enoic acid, (R)-bemeth#1, <sup>1</sup>H NMR spectrum (500 MHz, CDCl<sub>3</sub>)

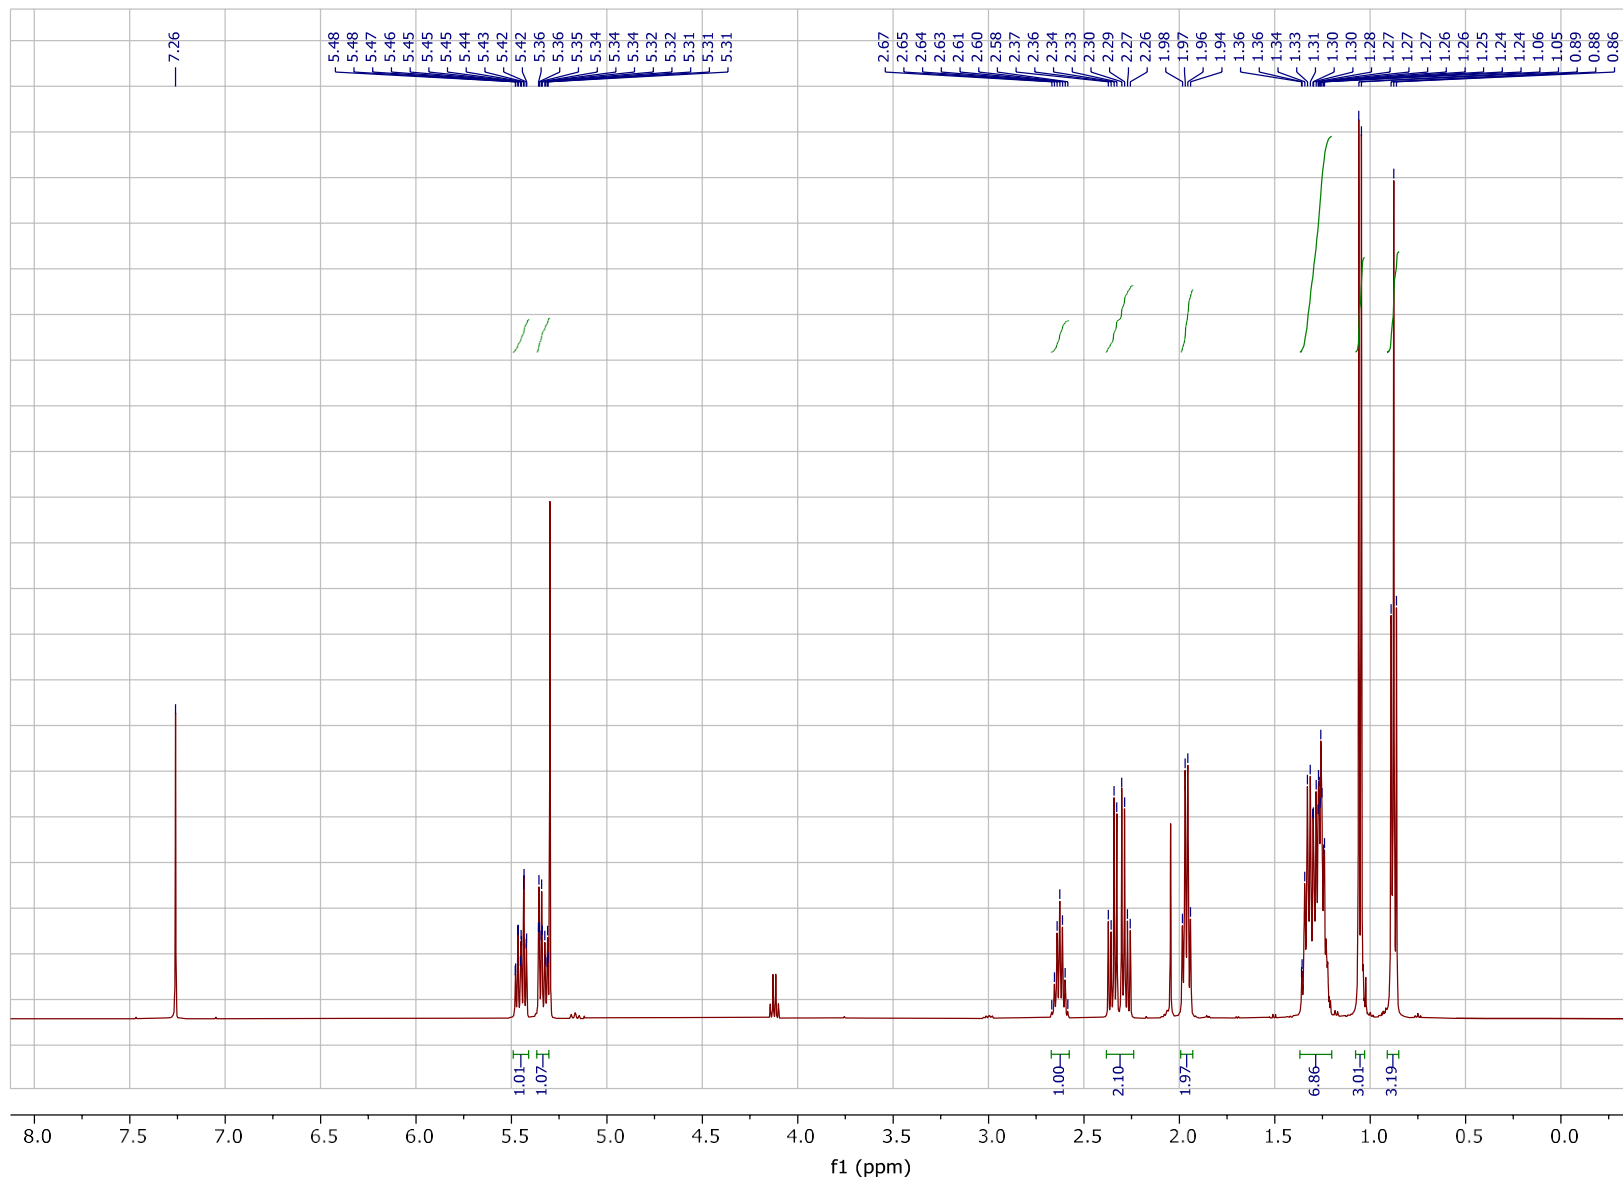

(*R,E*)-3-Methyl-dec-4-enoic acid, (*R*)-bemeth#1,  $^{13}\text{C}$  NMR spectrum(125 MHz,  $\text{CDCl}_3$ )

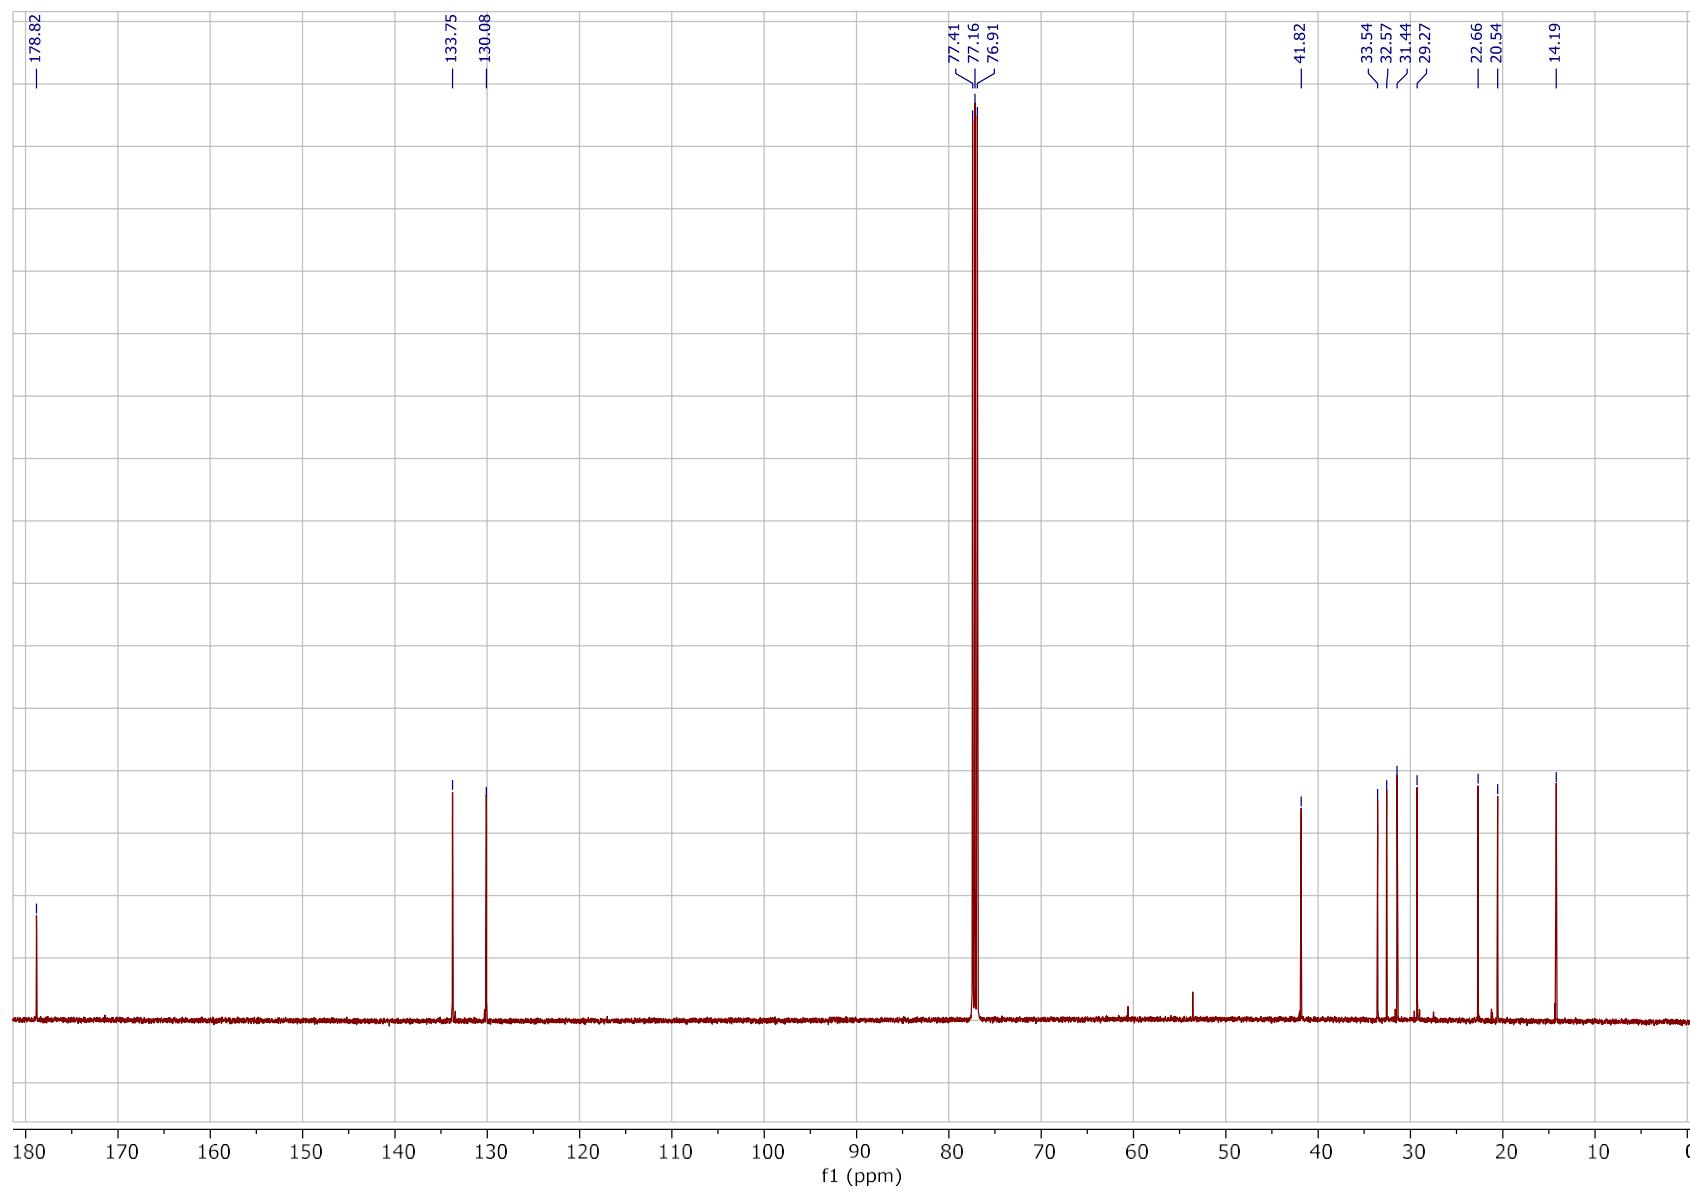

Methyl-(*R,E*)-3-methyl-dec-4-enoate (**8**), <sup>1</sup>H NMR spectrum (500 MHz, CDCl<sub>3</sub>)

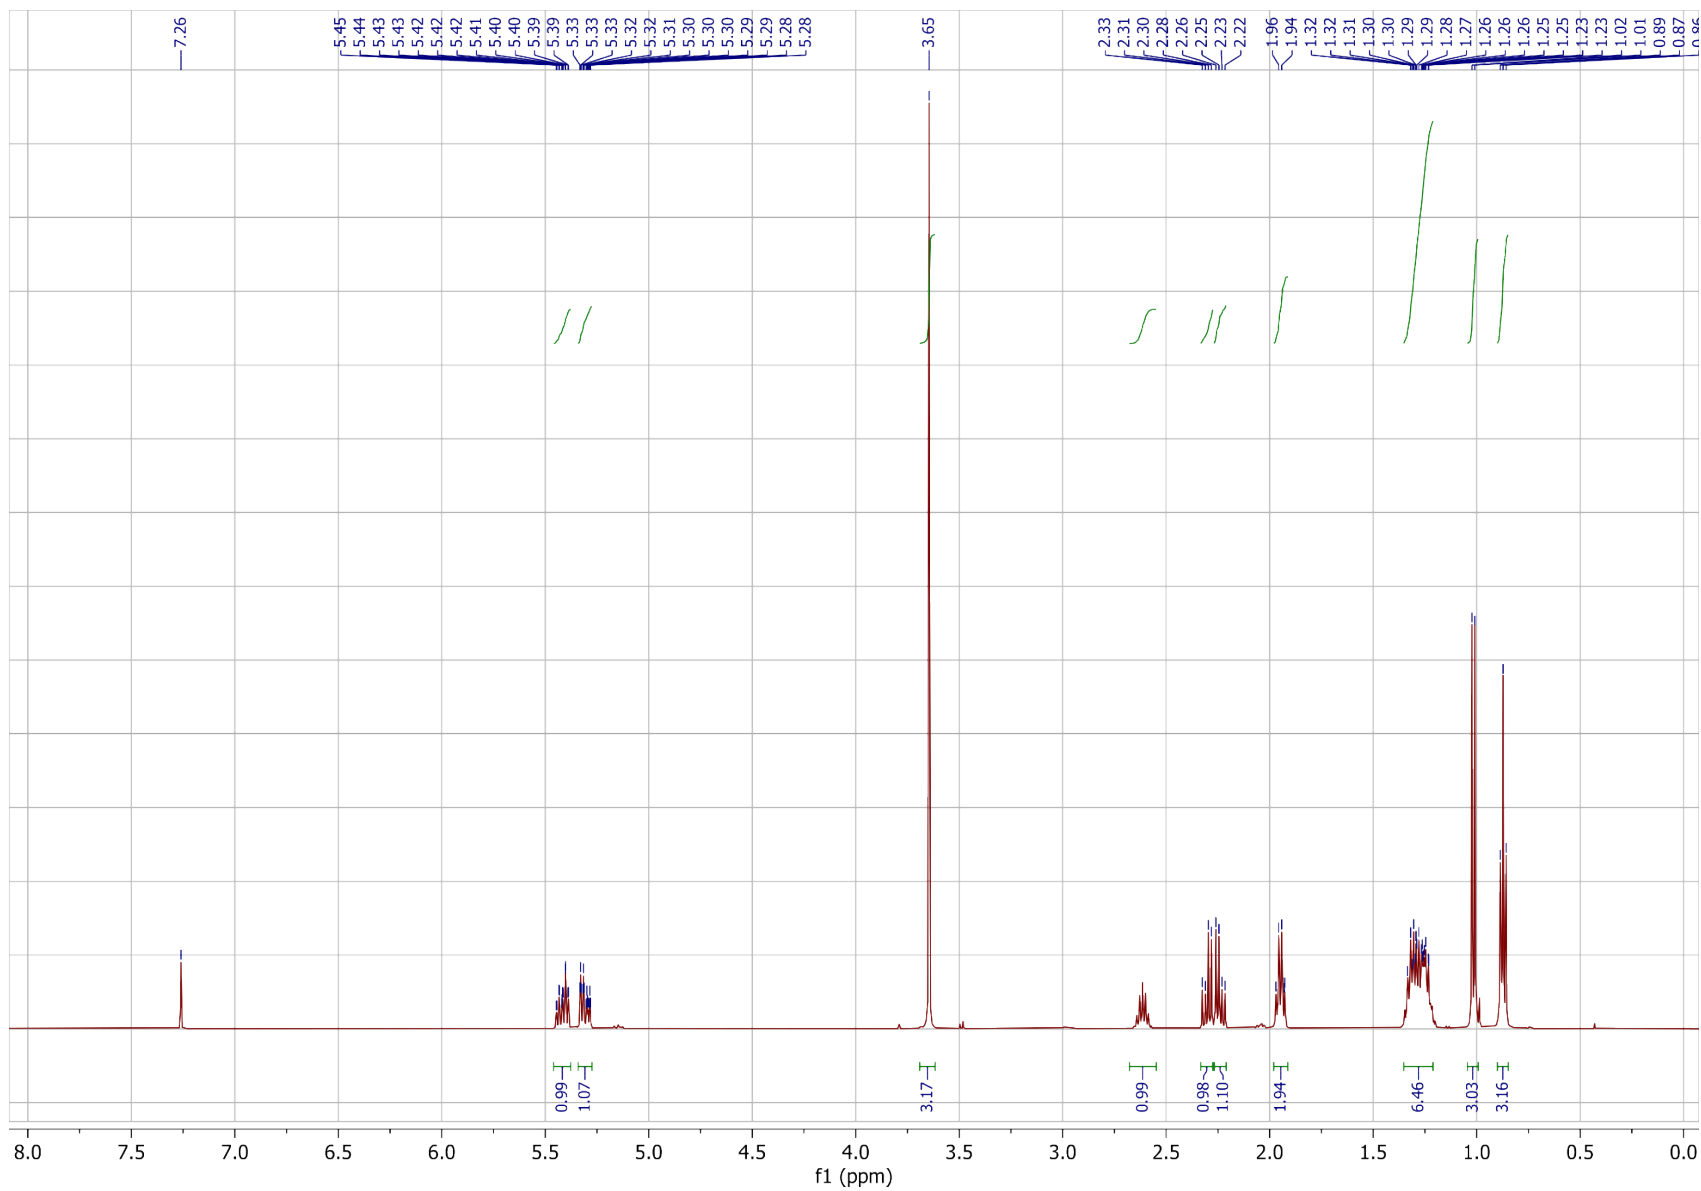

Methyl-(*R,E*)-3-methyl-dec-4-enoate (**8**),  $^{13}\text{C}$  NMR spectrum (125 MHz,  $\text{CDCl}_3$ )

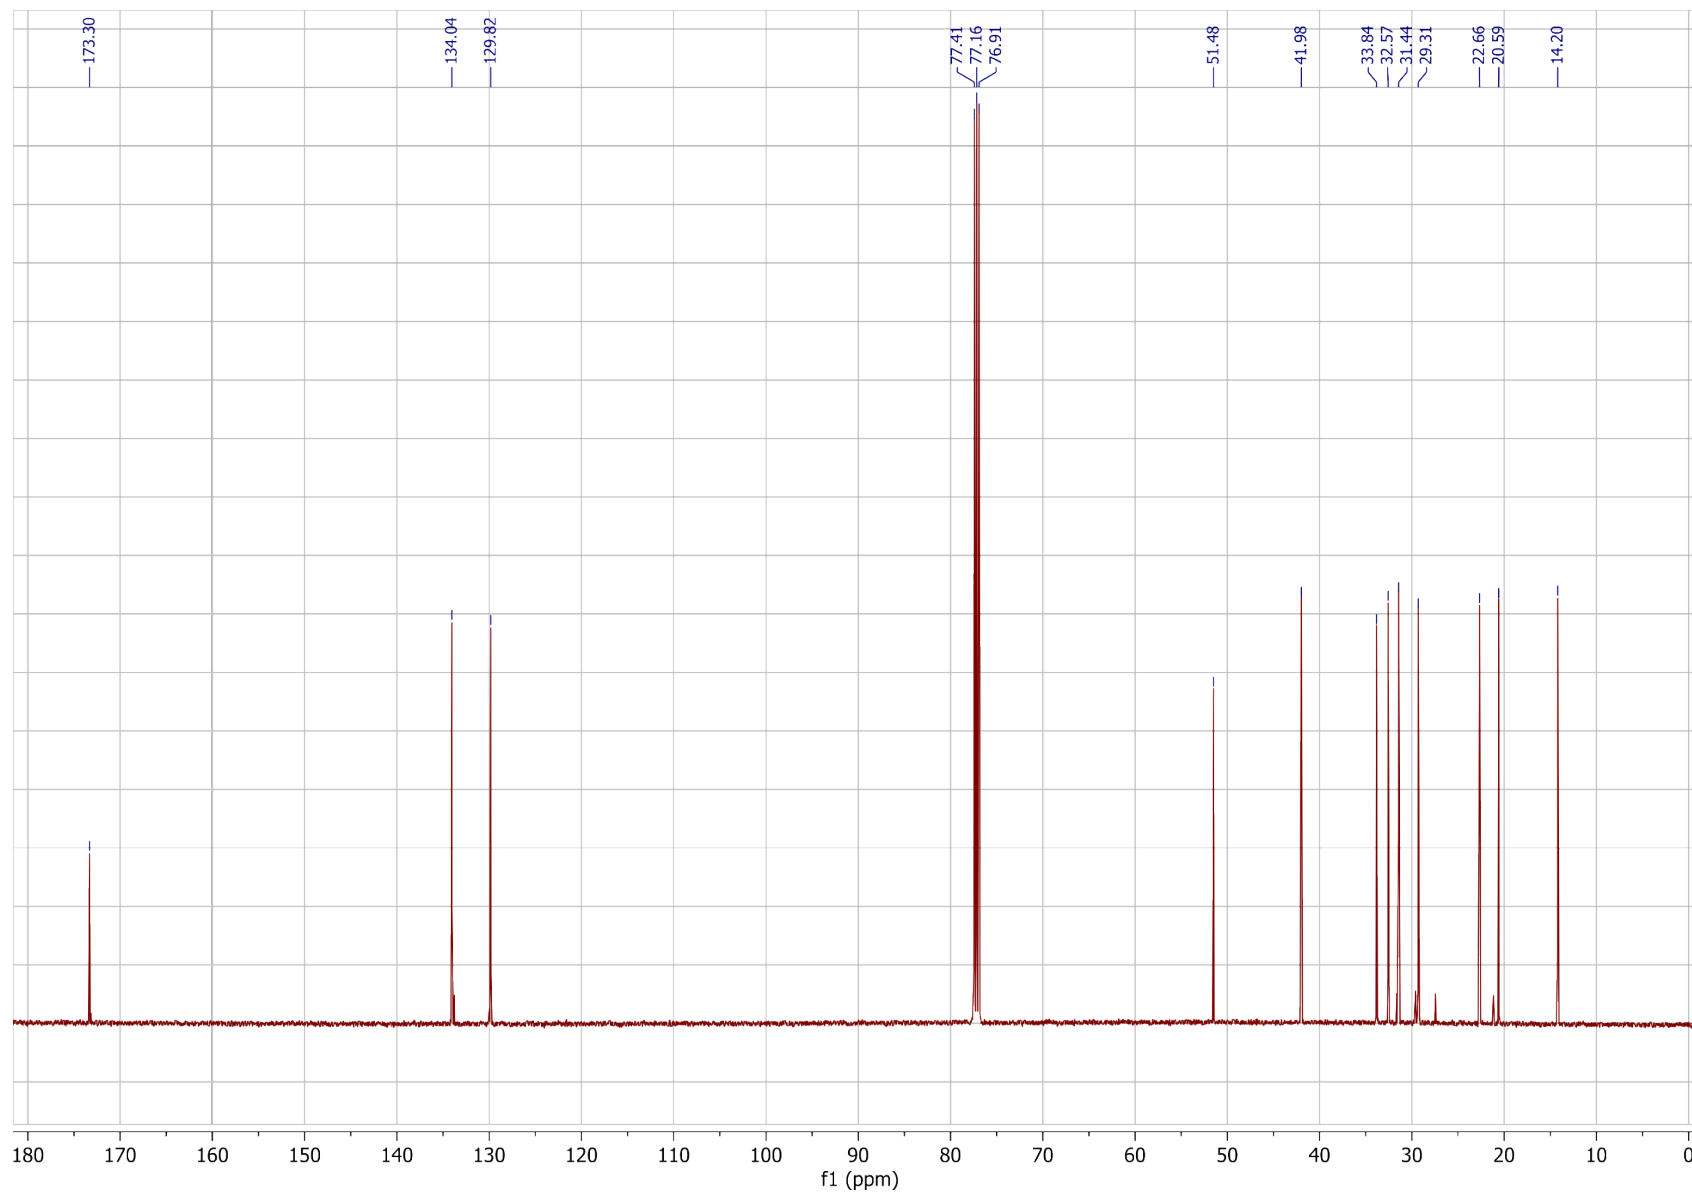



Methyl-(2*R*,3*S*,*E*)-2-hydroxy-3-methyl-dec-4-enoate (**9**), <sup>13</sup>C NMR spectrum (125 MHz, CDCl<sub>3</sub>)

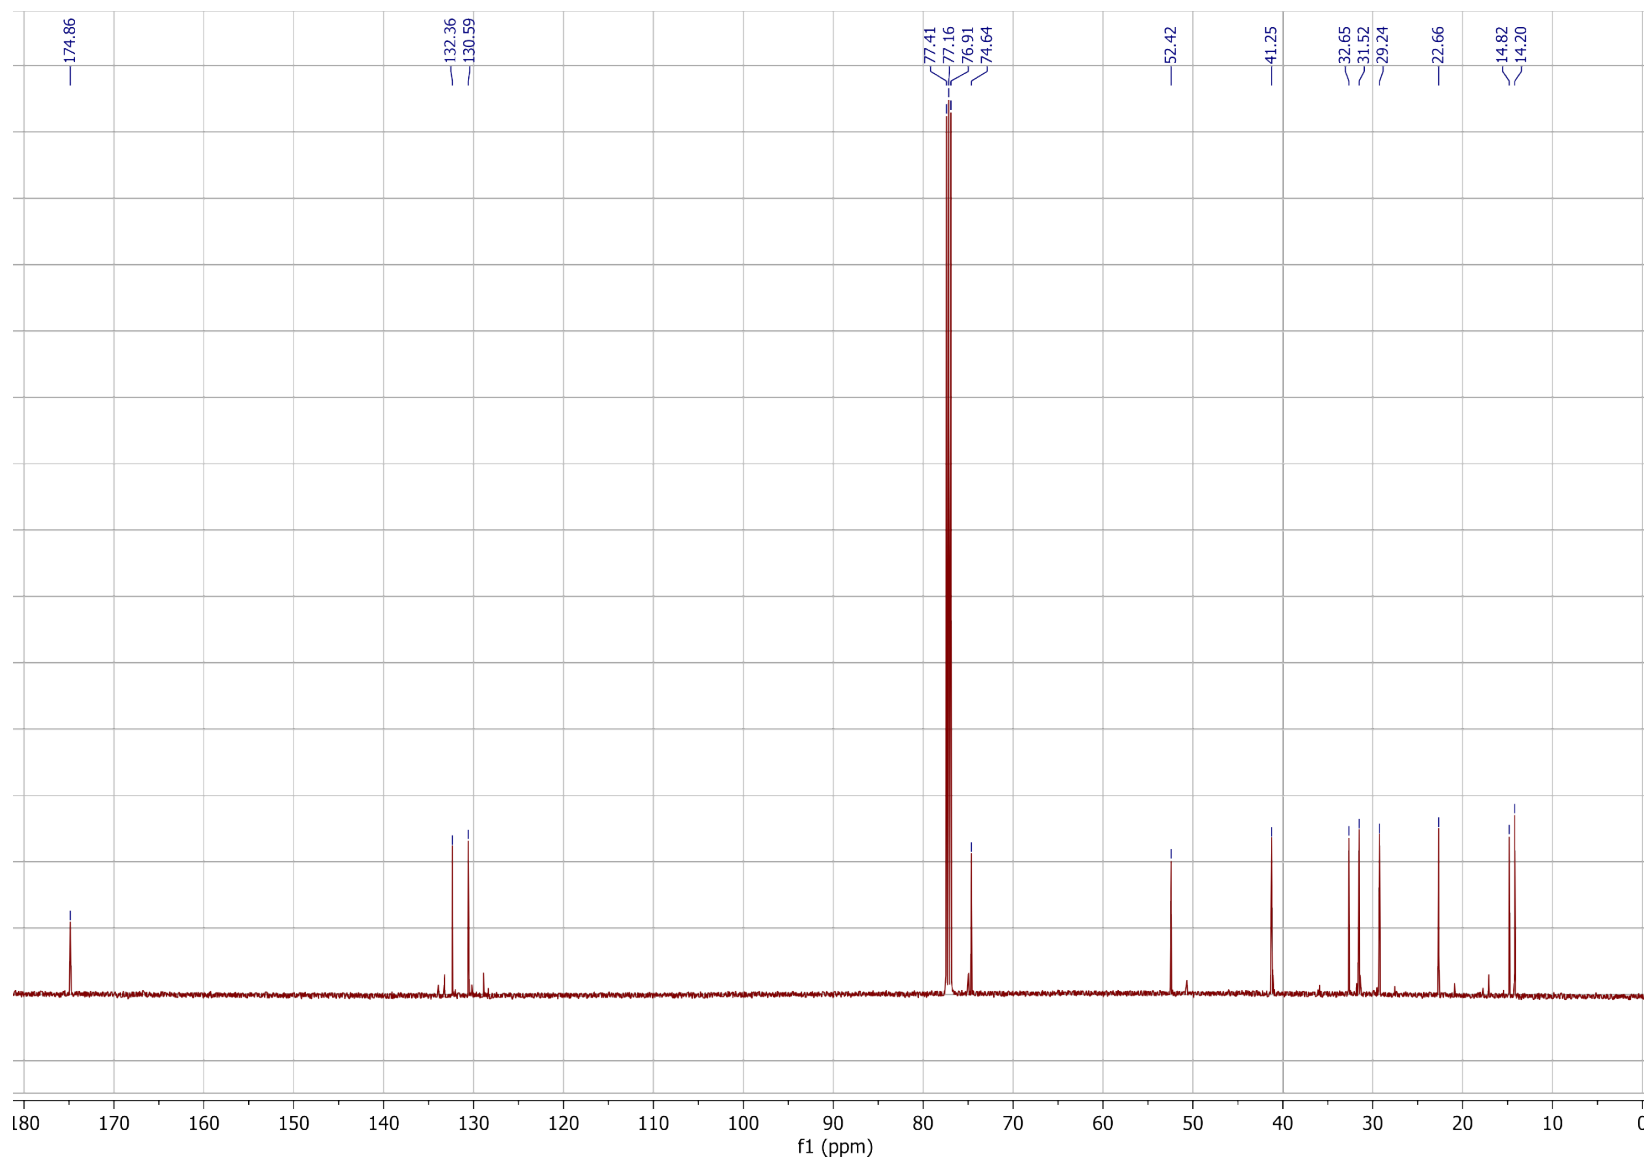



(2*R*,3*S*,*E*)-2-hydroxy-3-methyl-dec-4-enoic acid, (2*R*,3*S*)-bemeth#2, <sup>1</sup>H NMR spectrum (500 MHz, CDCl<sub>3</sub>)

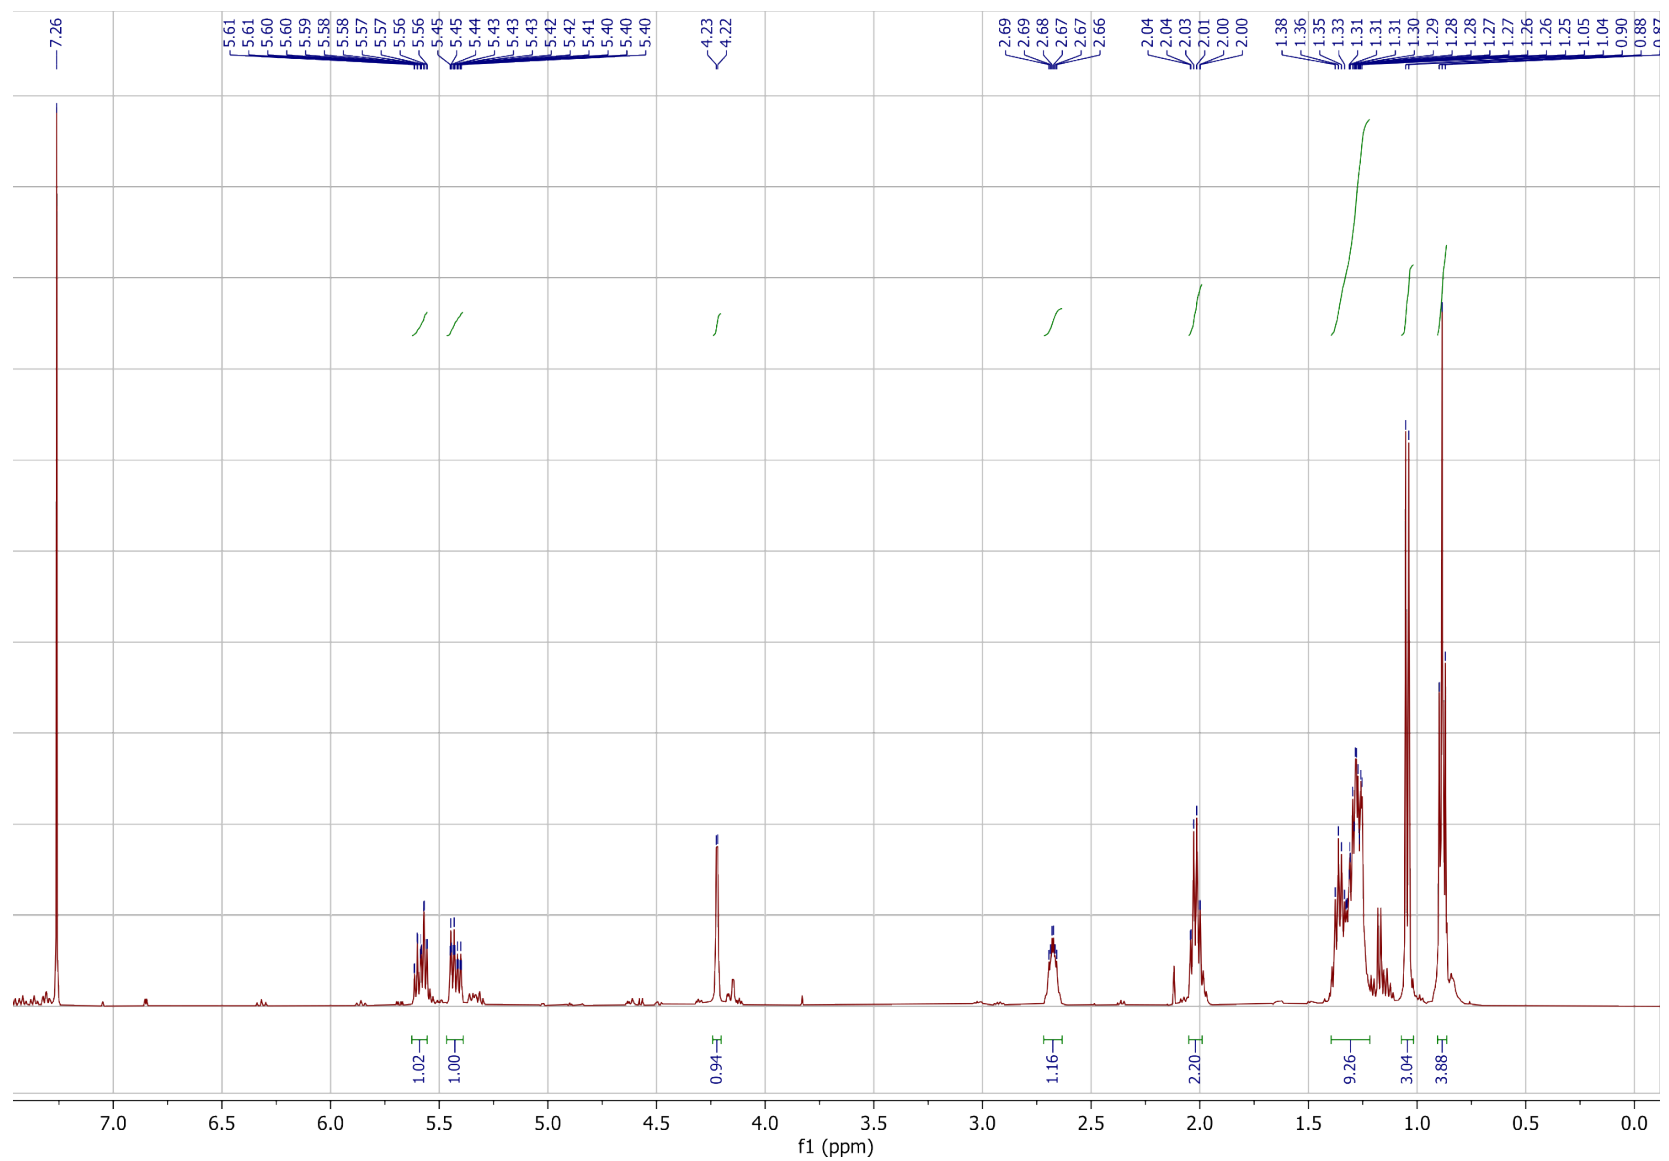

(2*R*,3*S*,*E*)-2-hydroxy-3-methyl-dec-4-enoic acid, (2*R*,3*S*)-bemeth#2, <sup>13</sup>C NMR spectrum (125 MHz, CDCl<sub>3</sub>)

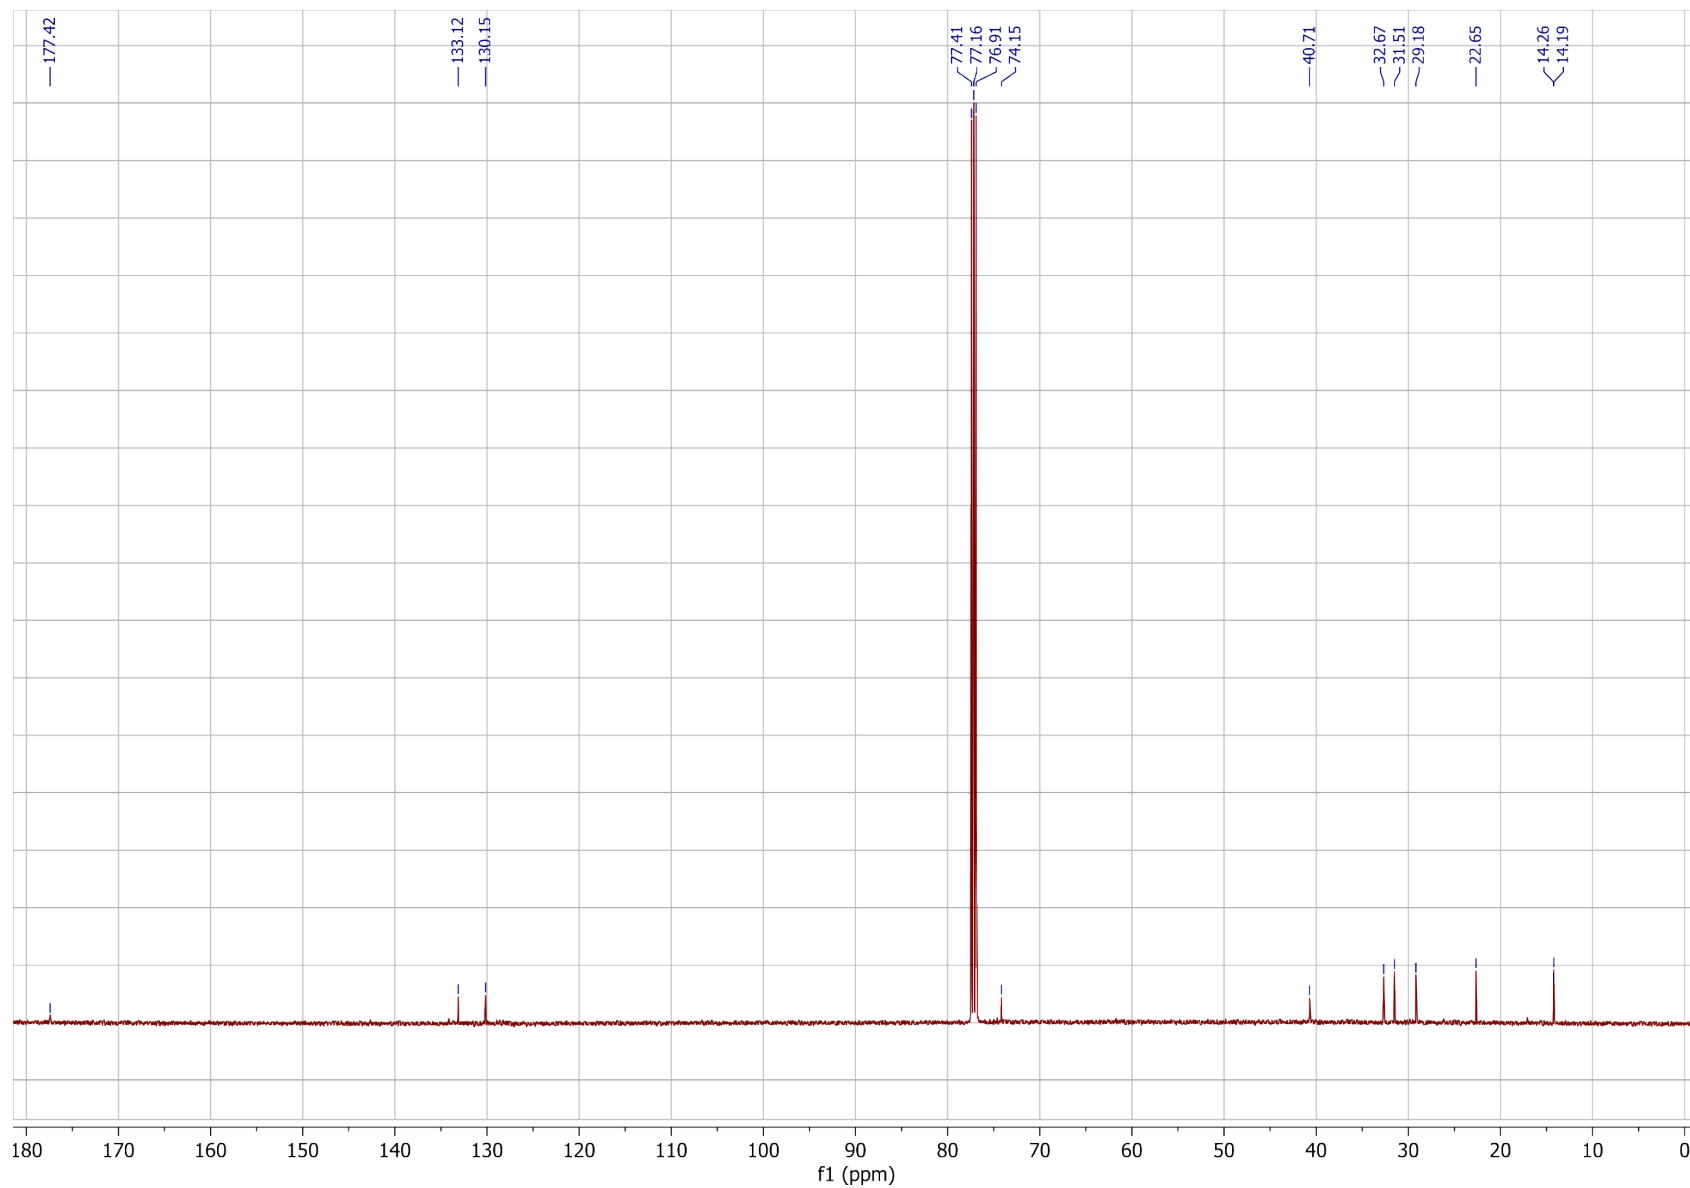

Comparison of  $^1\text{H}$  NMR (400 MHz,  $\text{CD}_3\text{OD}$ ) spectra for Mosher analysis. Earlier and later eluting diastereomers were separated following derivatization with (*R*)-MTPA-Cl. Derivatization of the major natural isomer, (*2R,3S*)-bemeth#2, exhibited identical chromatographic retention and chemical shifts as the later eluting fraction.

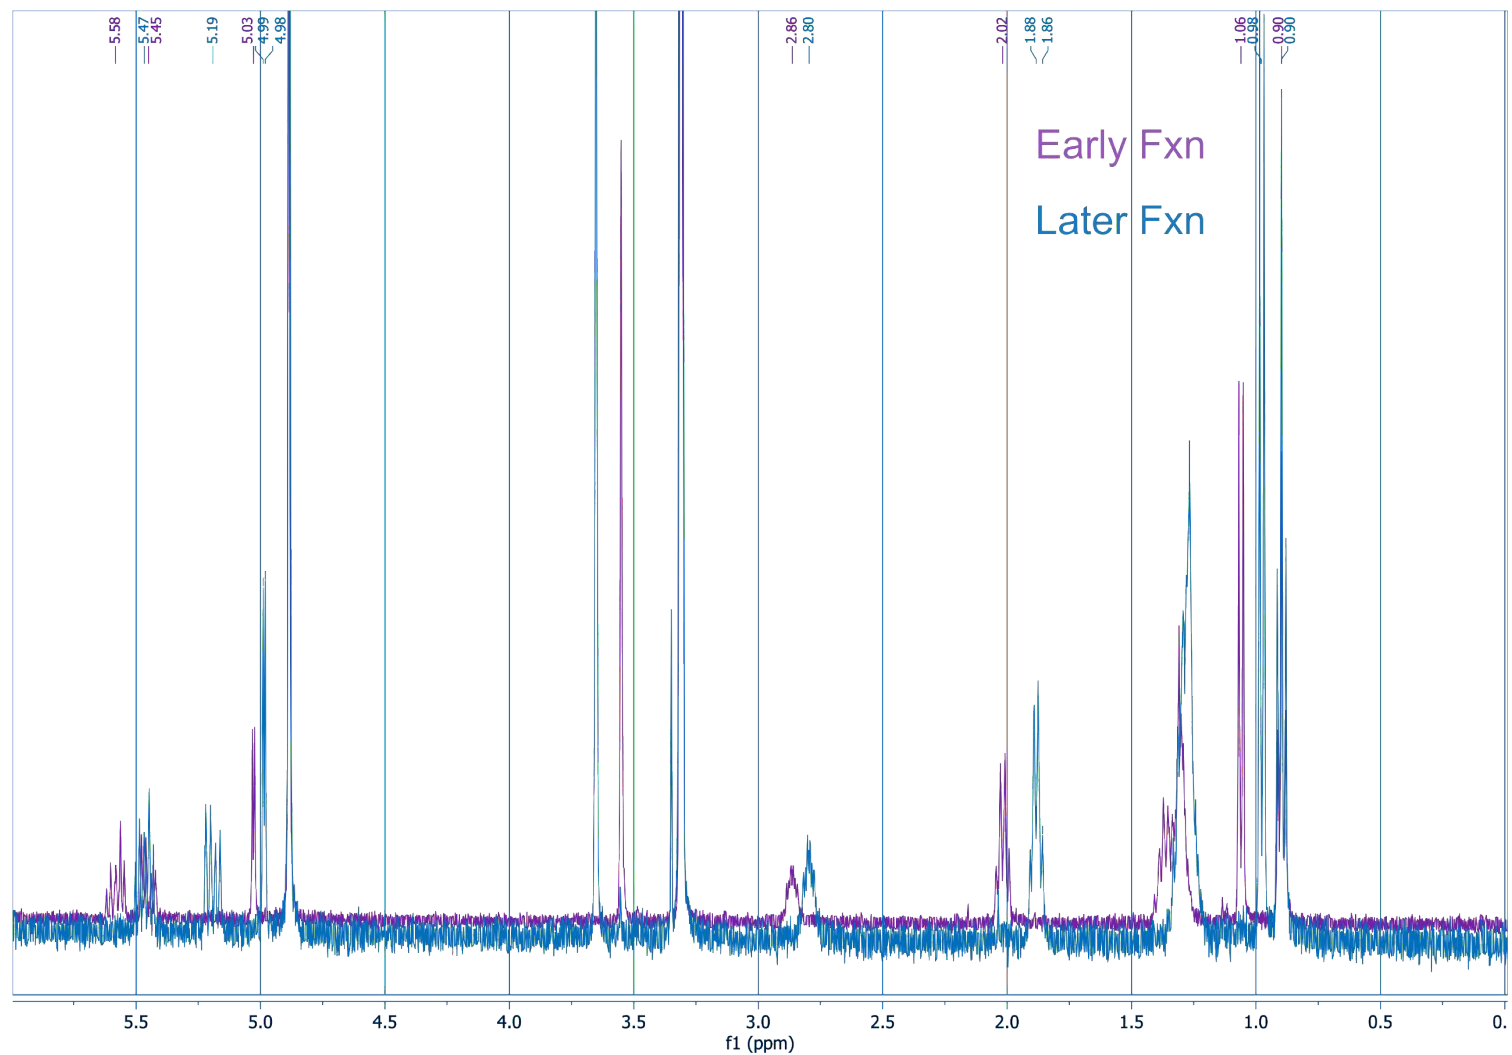

Supplement: 41467_2024_45782_MOESM1_ESM.pdf [file 41467_2024_45782_MOESM1_ESM.pdf]
